# Supplementary material for: Cardiovascular adverse events are associated with usage of immune checkpoint inhibitors in real-world clinical data across the United States
Source: PubMed Central journal article supplement — ESMO Open. 2021 Aug 27;6(5):100252. doi: 10.1016/j.esmoop.2021.100252 (PMC8403739; doi:10.1016/j.esmoop.2021.100252), 2021-08-27

## A) ICI (matched to chemotherapy) vs. Non-ICI (chemotherapy)

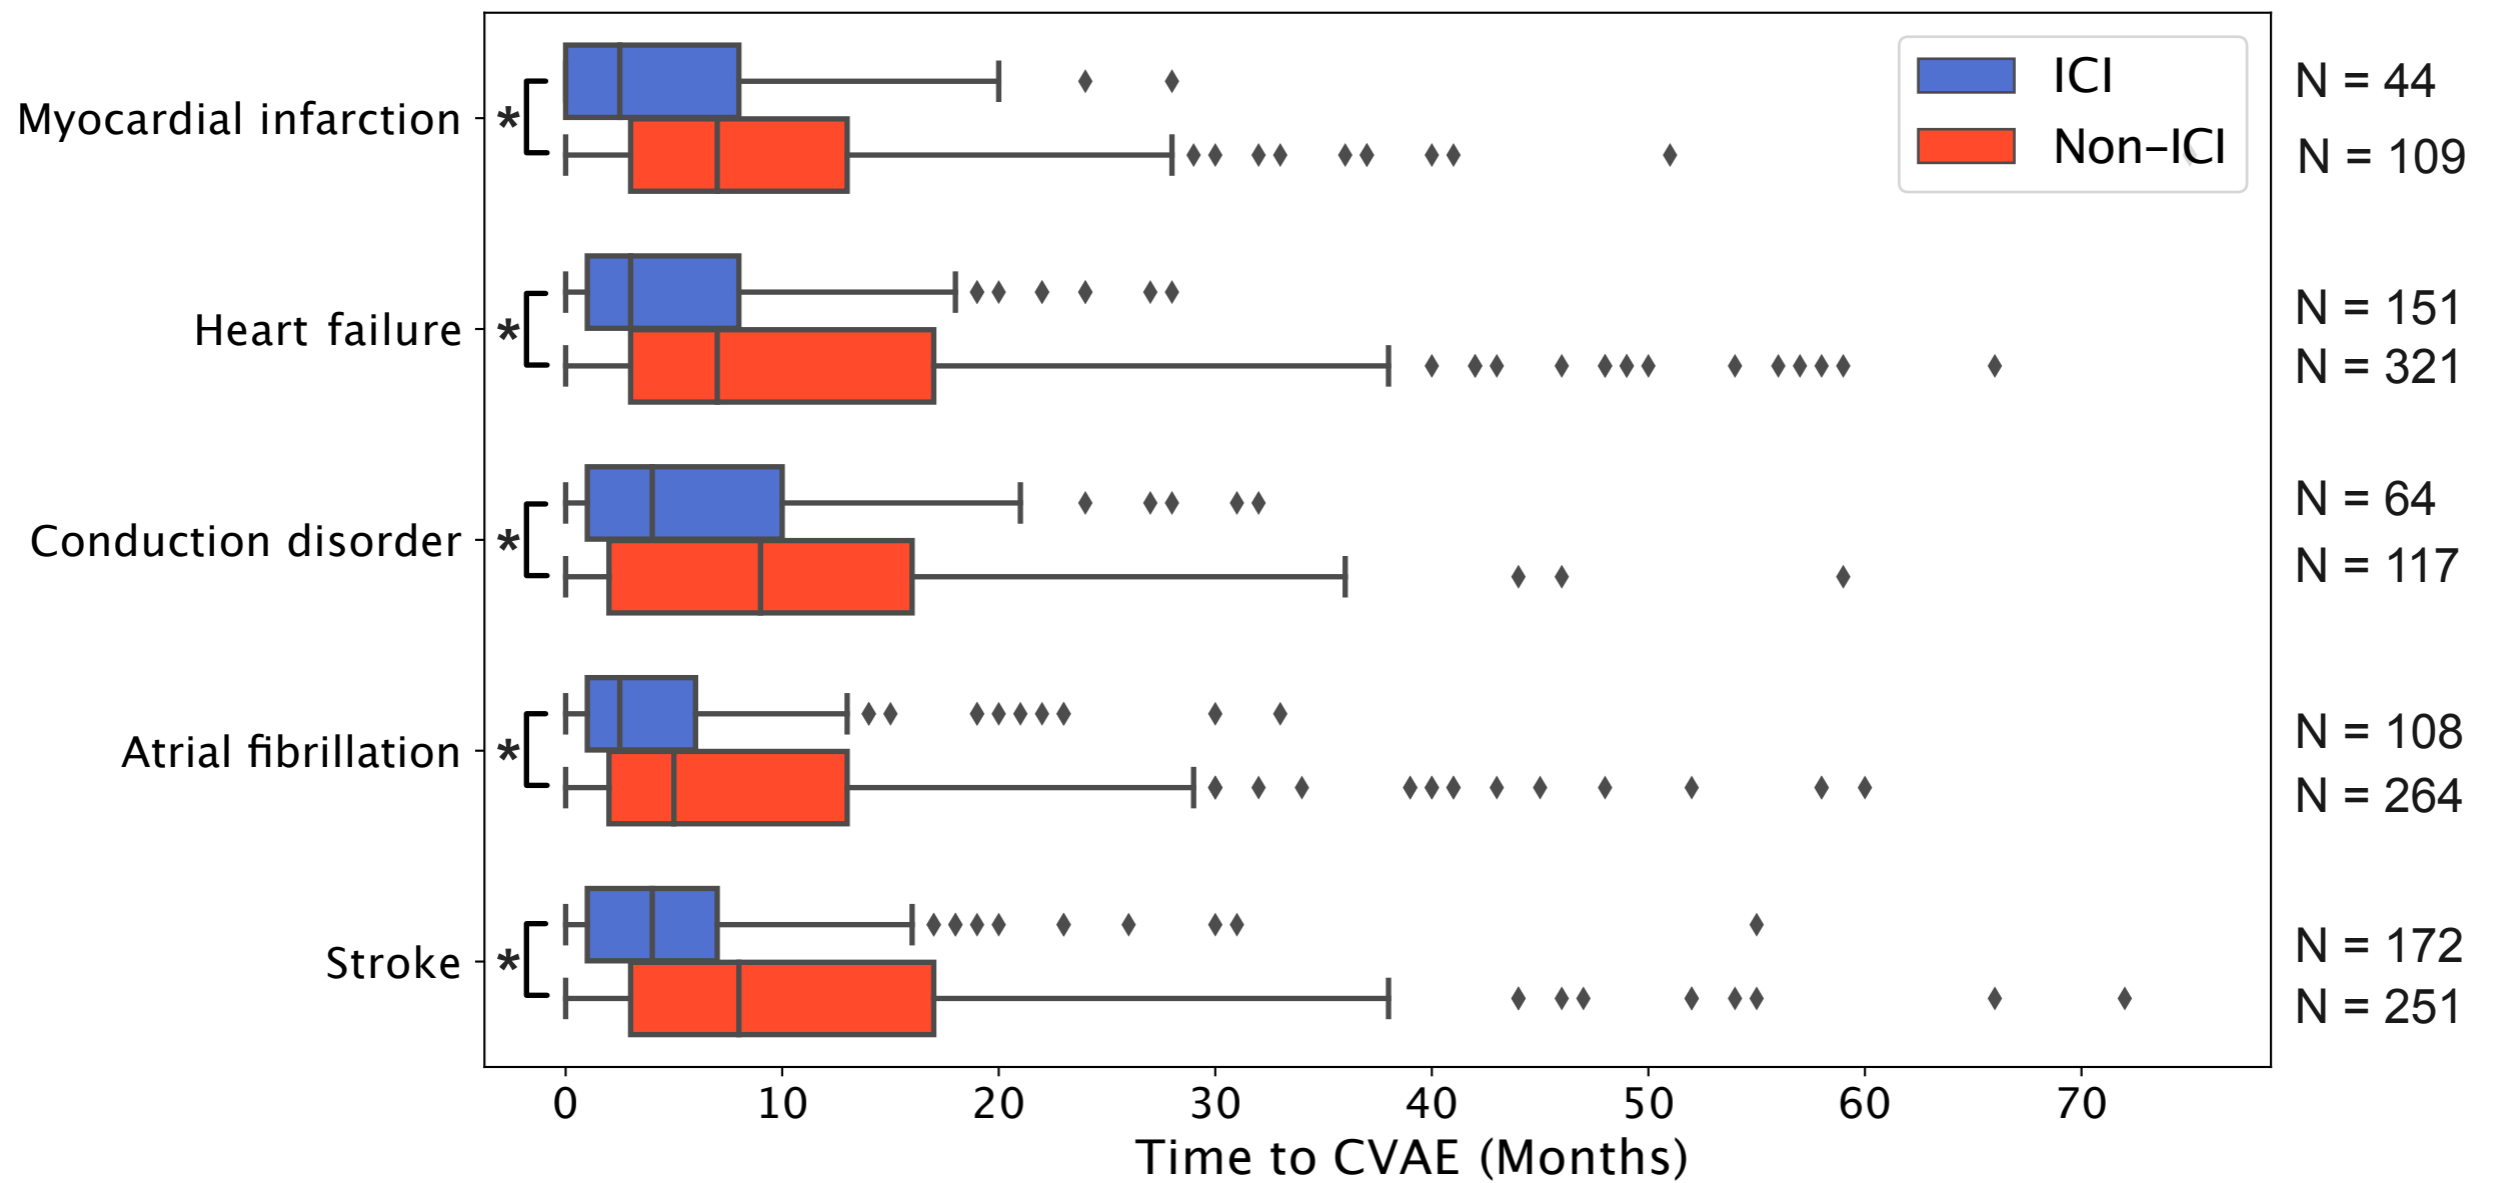

## B) ICI (matched to targeted agents) vs. Non-ICI (targeted agents)

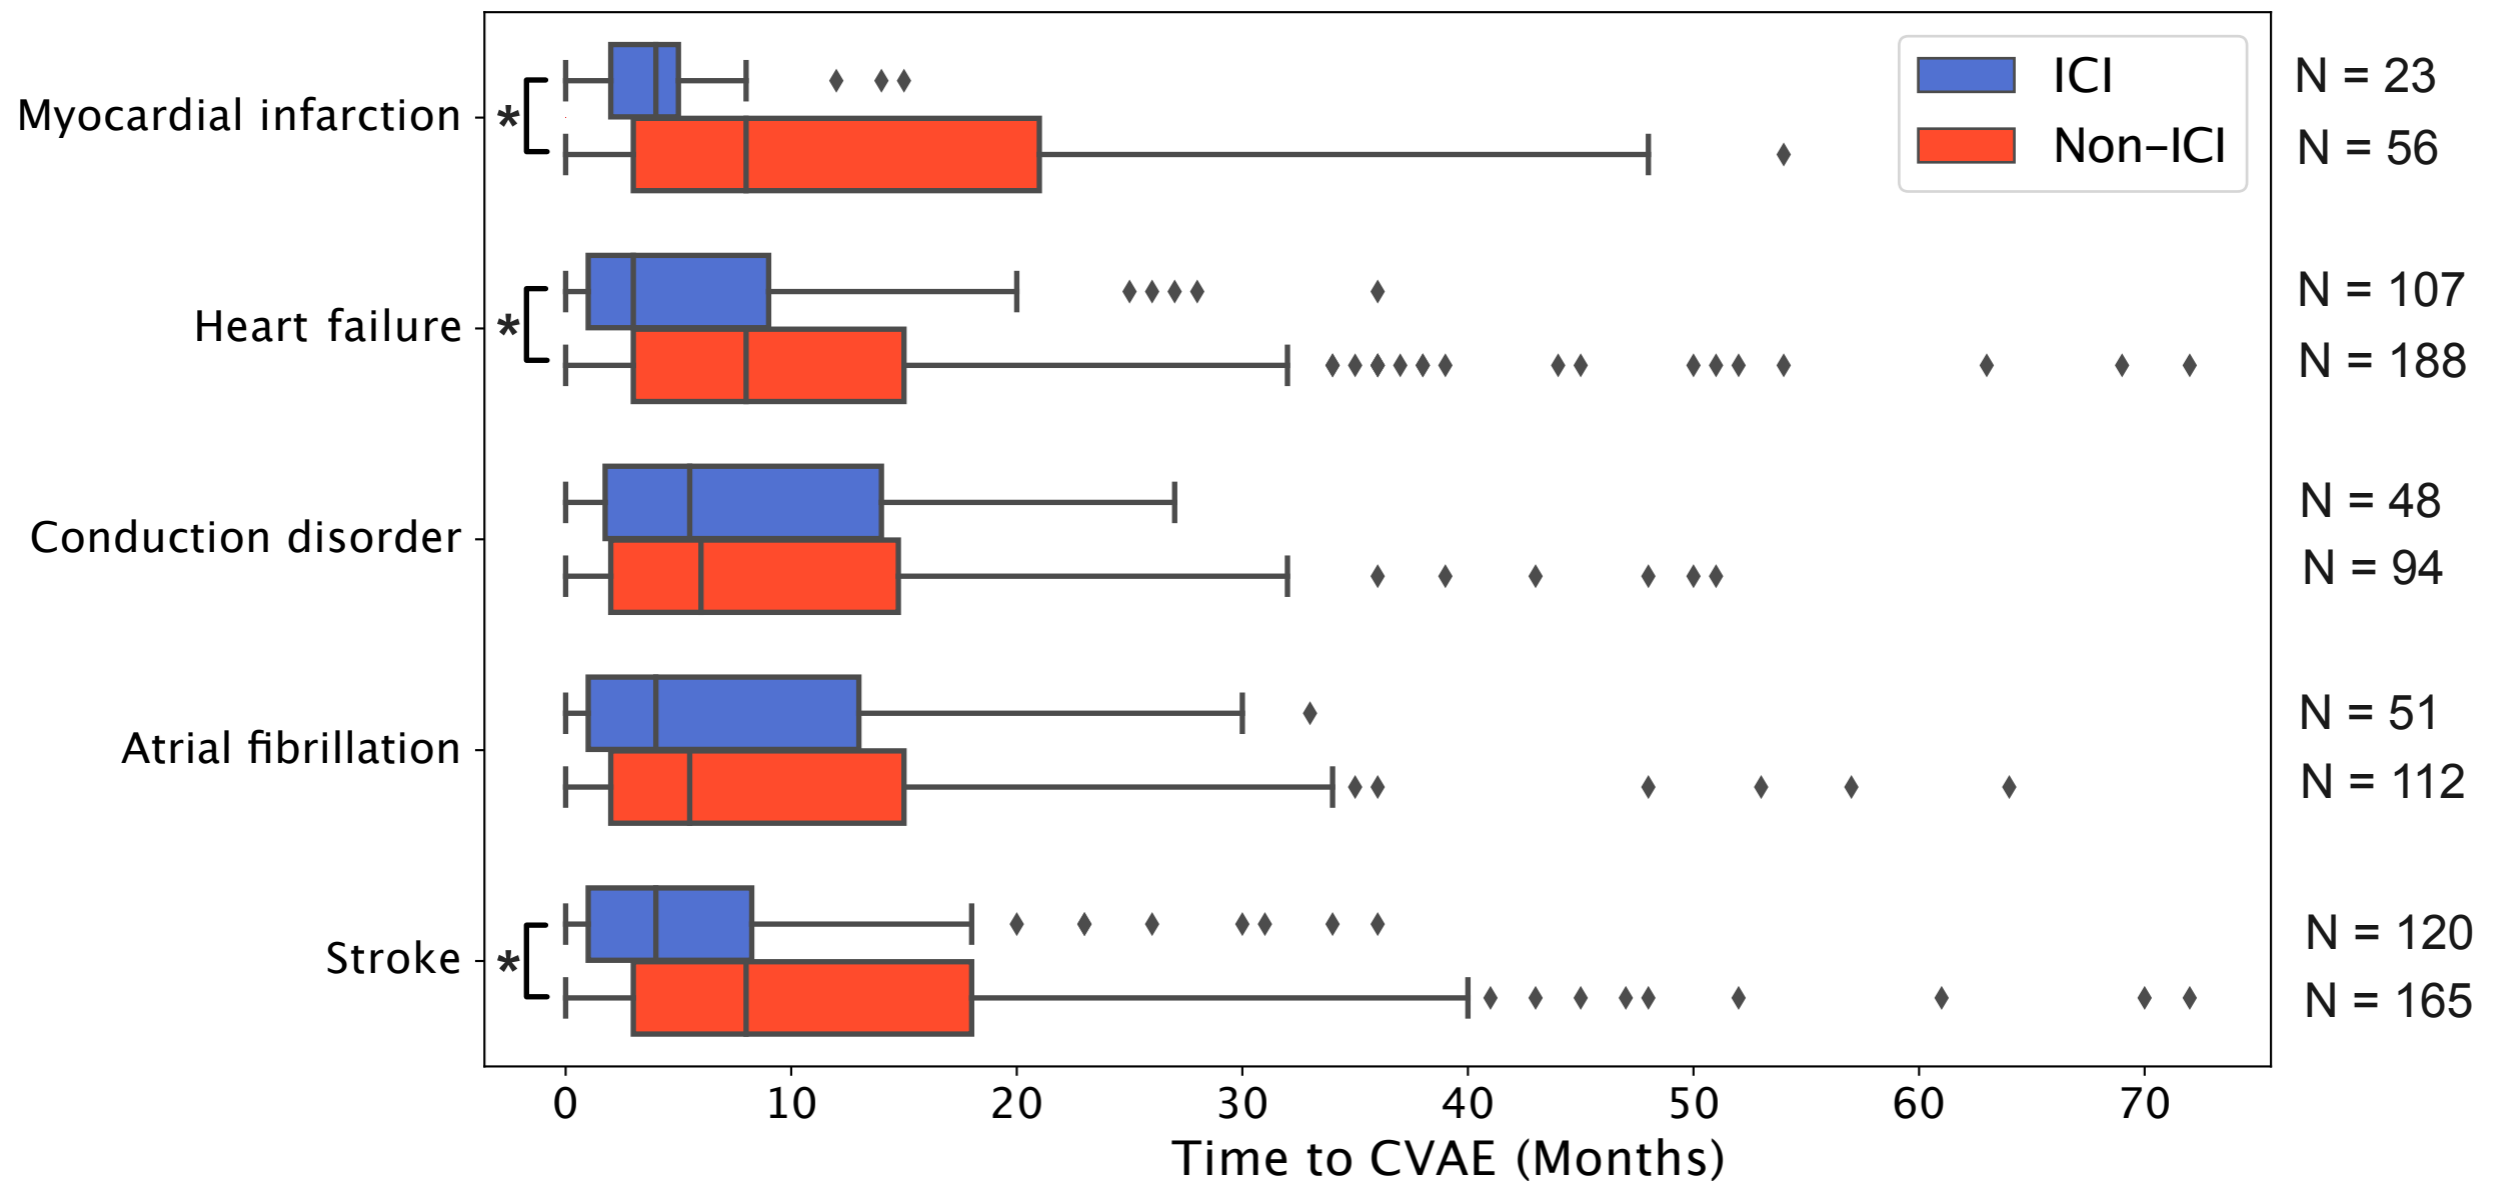

Supplement: mmc8.pdf [file mmc8.pdf]
