# Supplementary figures and images for: Cardiovascular adverse events are associated with usage of immune checkpoint inhibitors in real-world clinical data across the United States
Source: PubMed Central journal article supplement — ESMO Open. 2021 Aug 27;6(5):100252. doi: 10.1016/j.esmoop.2021.100252 (PMC8403739; doi:10.1016/j.esmoop.2021.100252), 2021-08-27

# MarketScan Python Pipeline

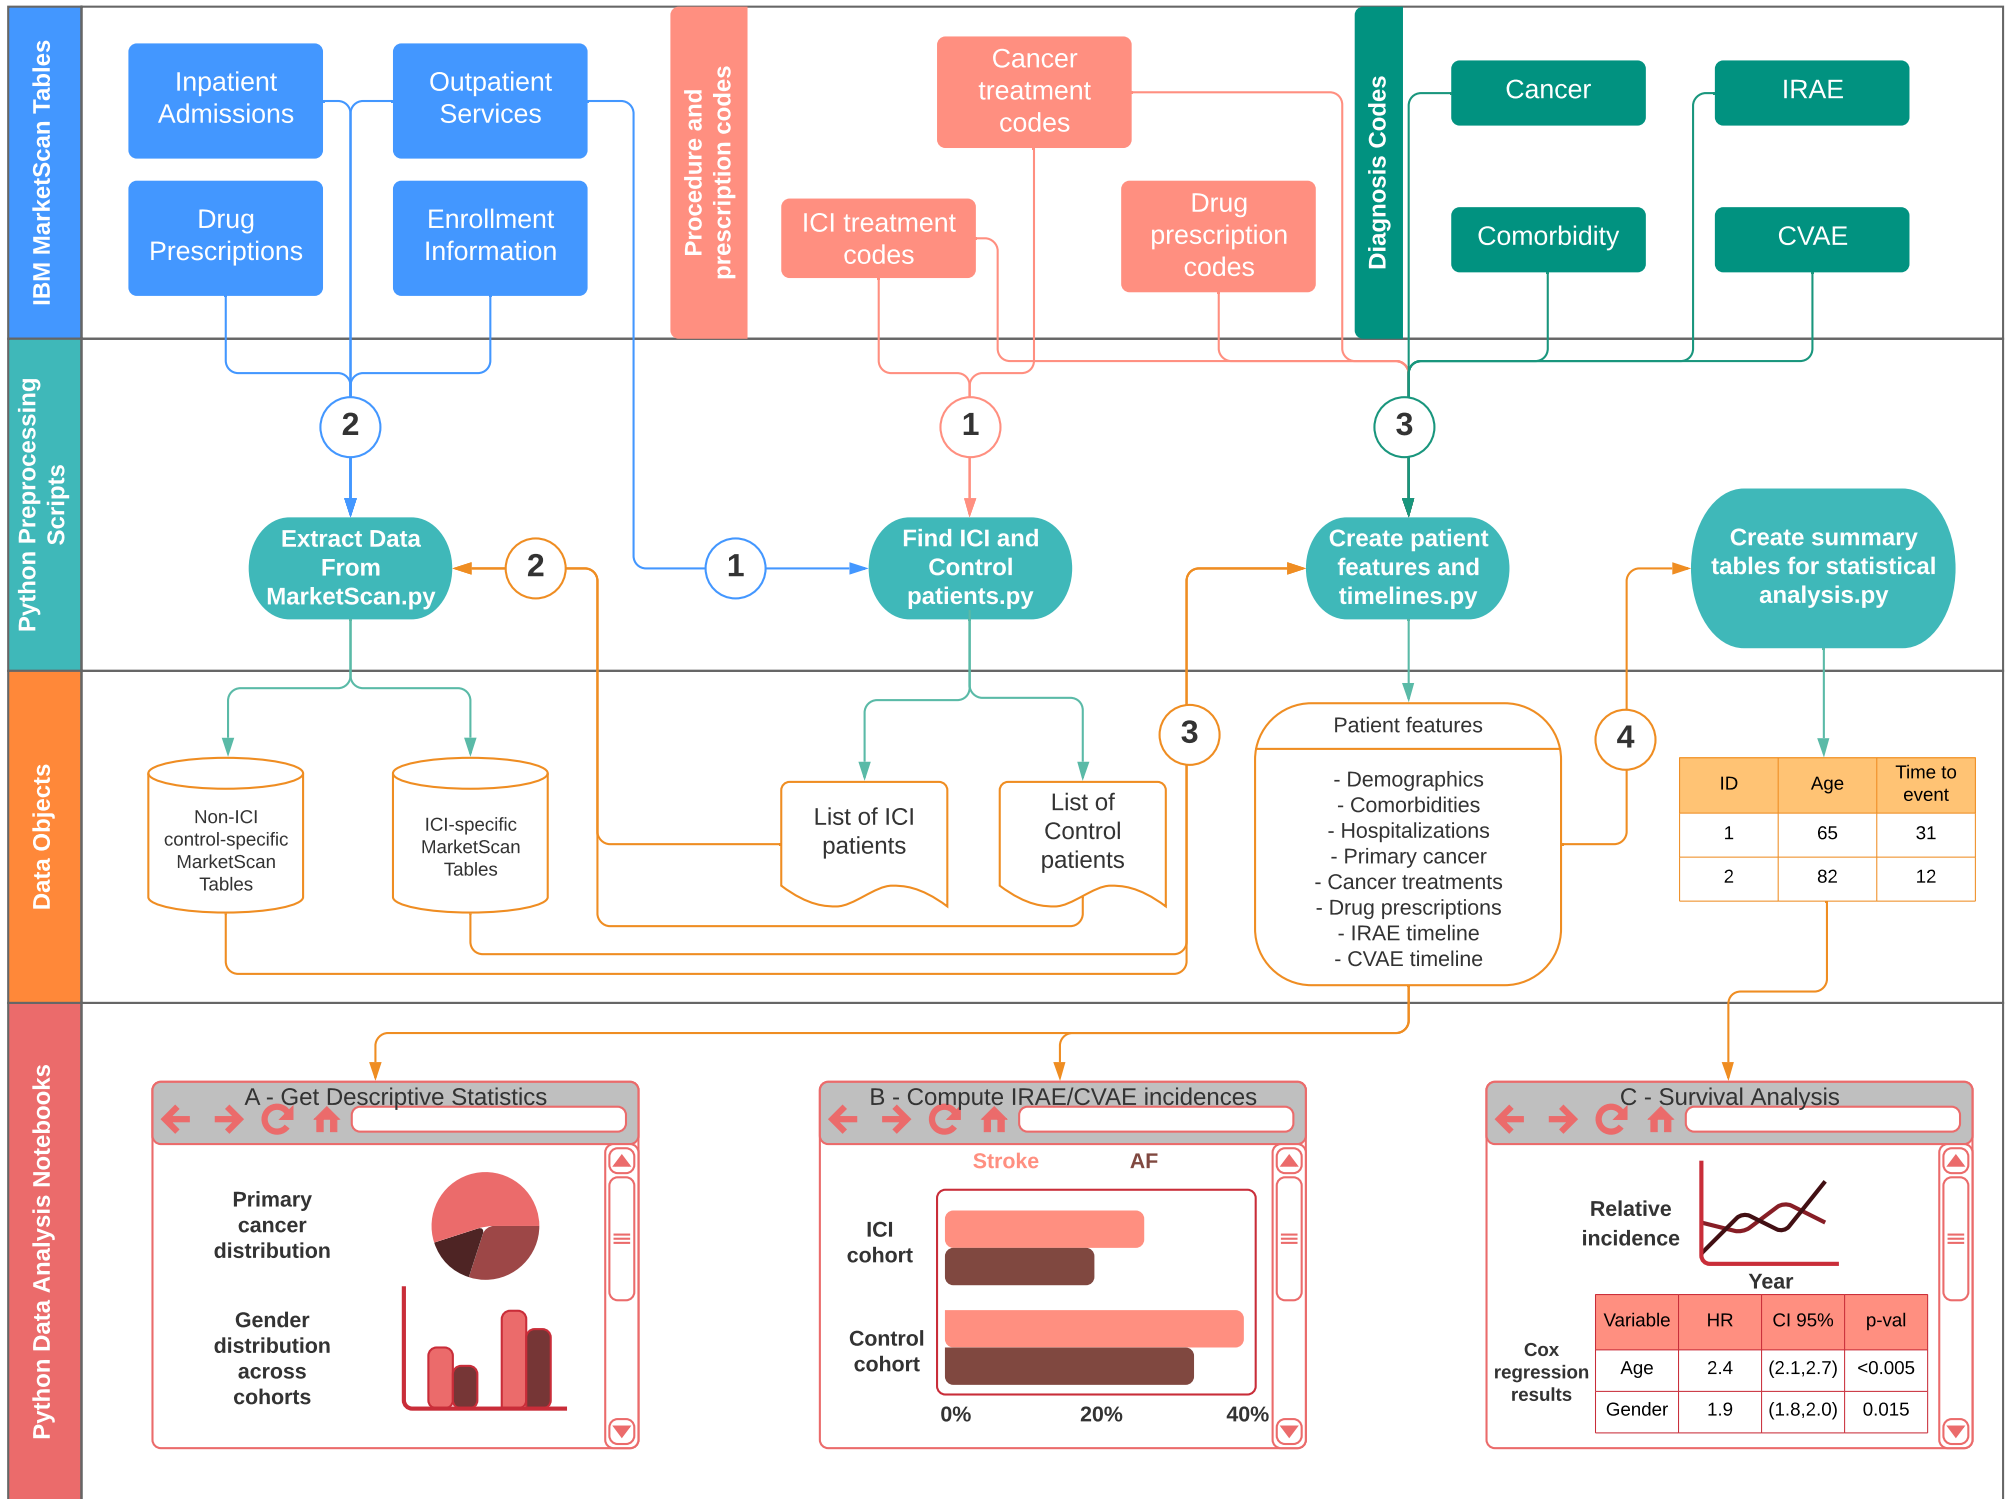

Supplement: mmc3.pdf [file mmc3.pdf]

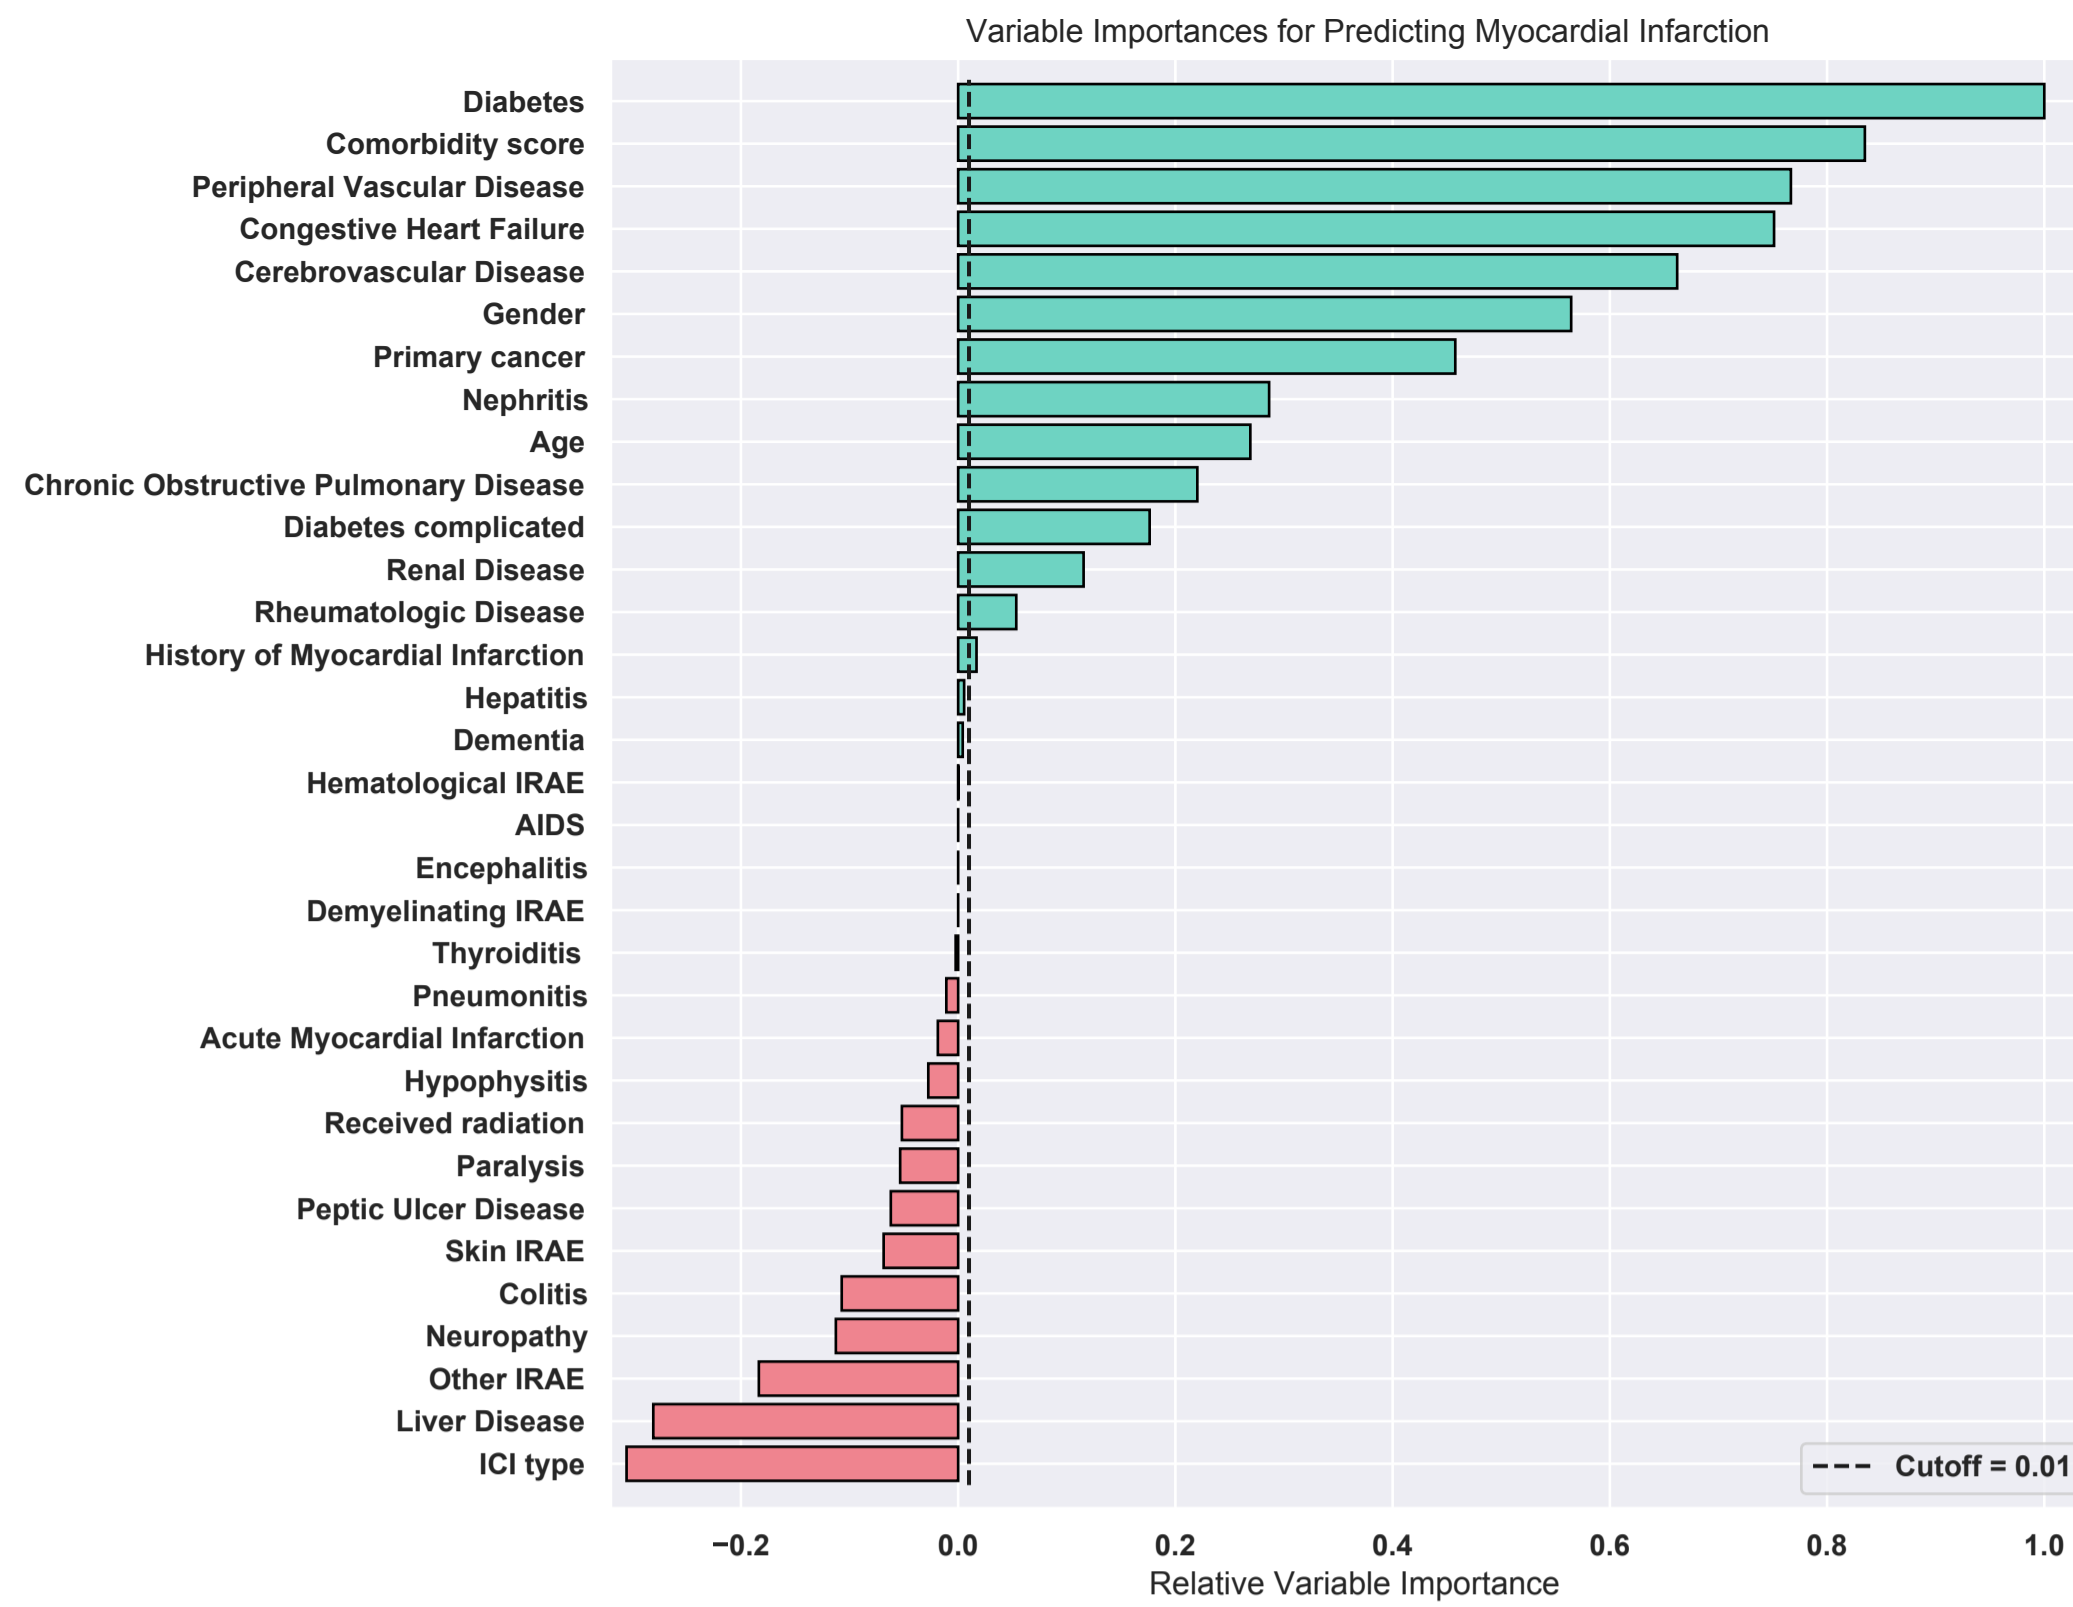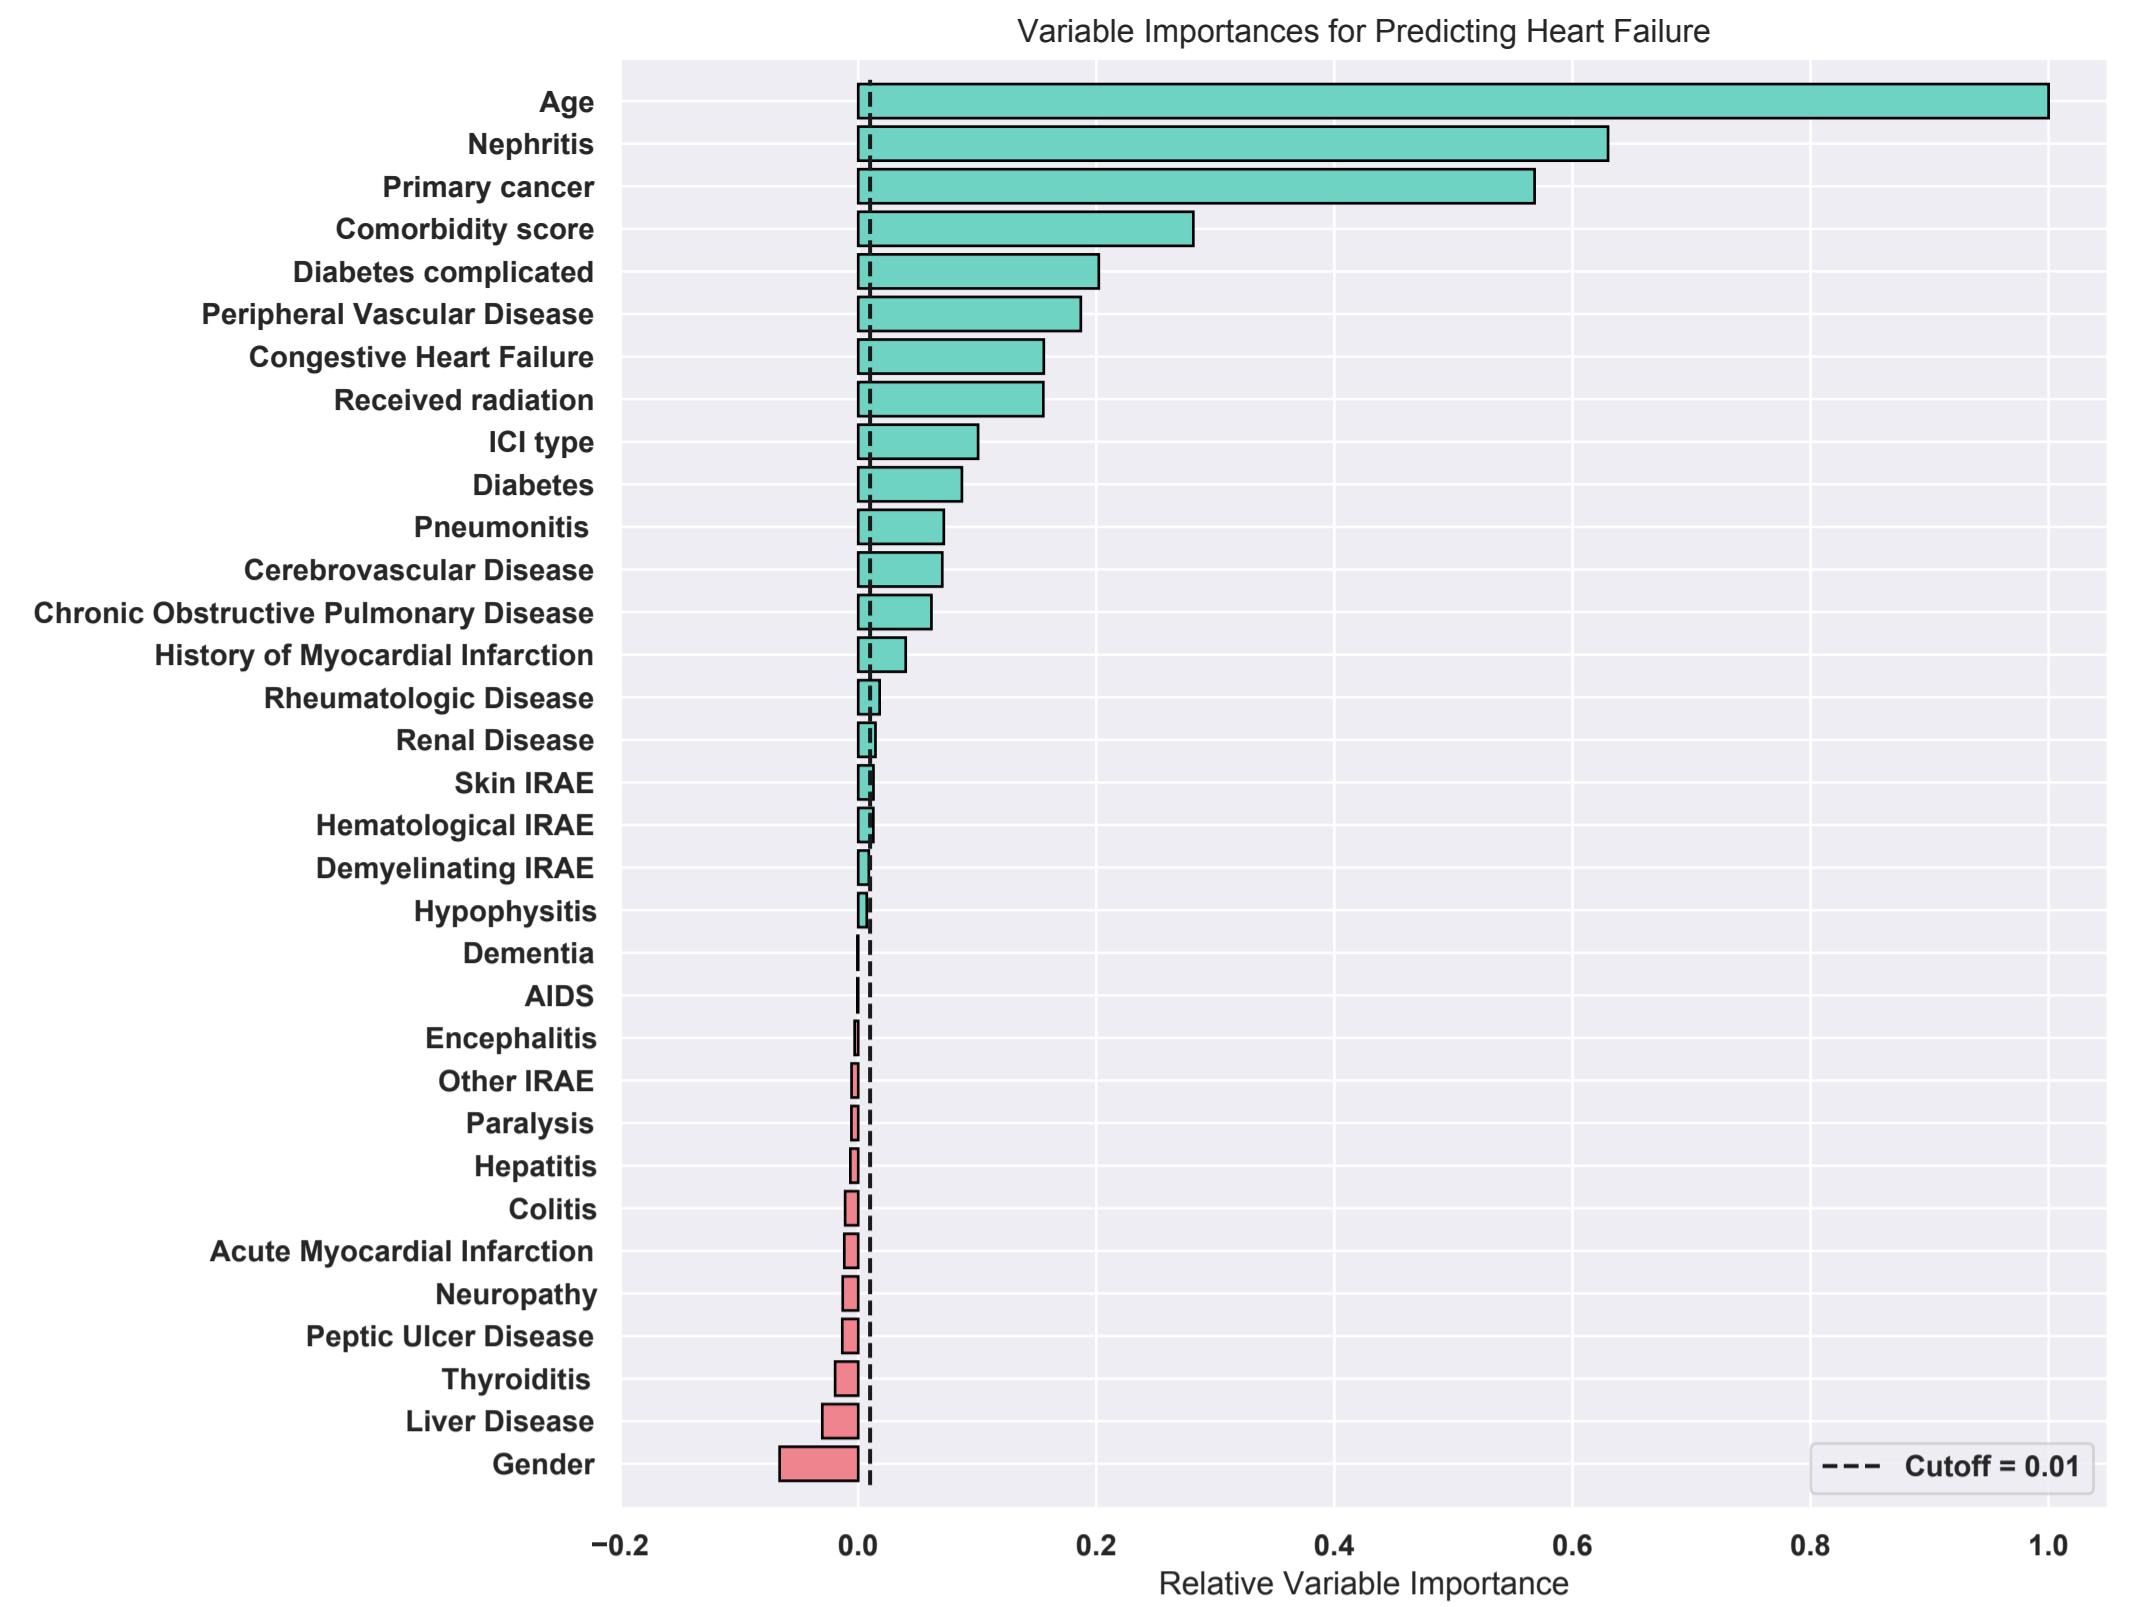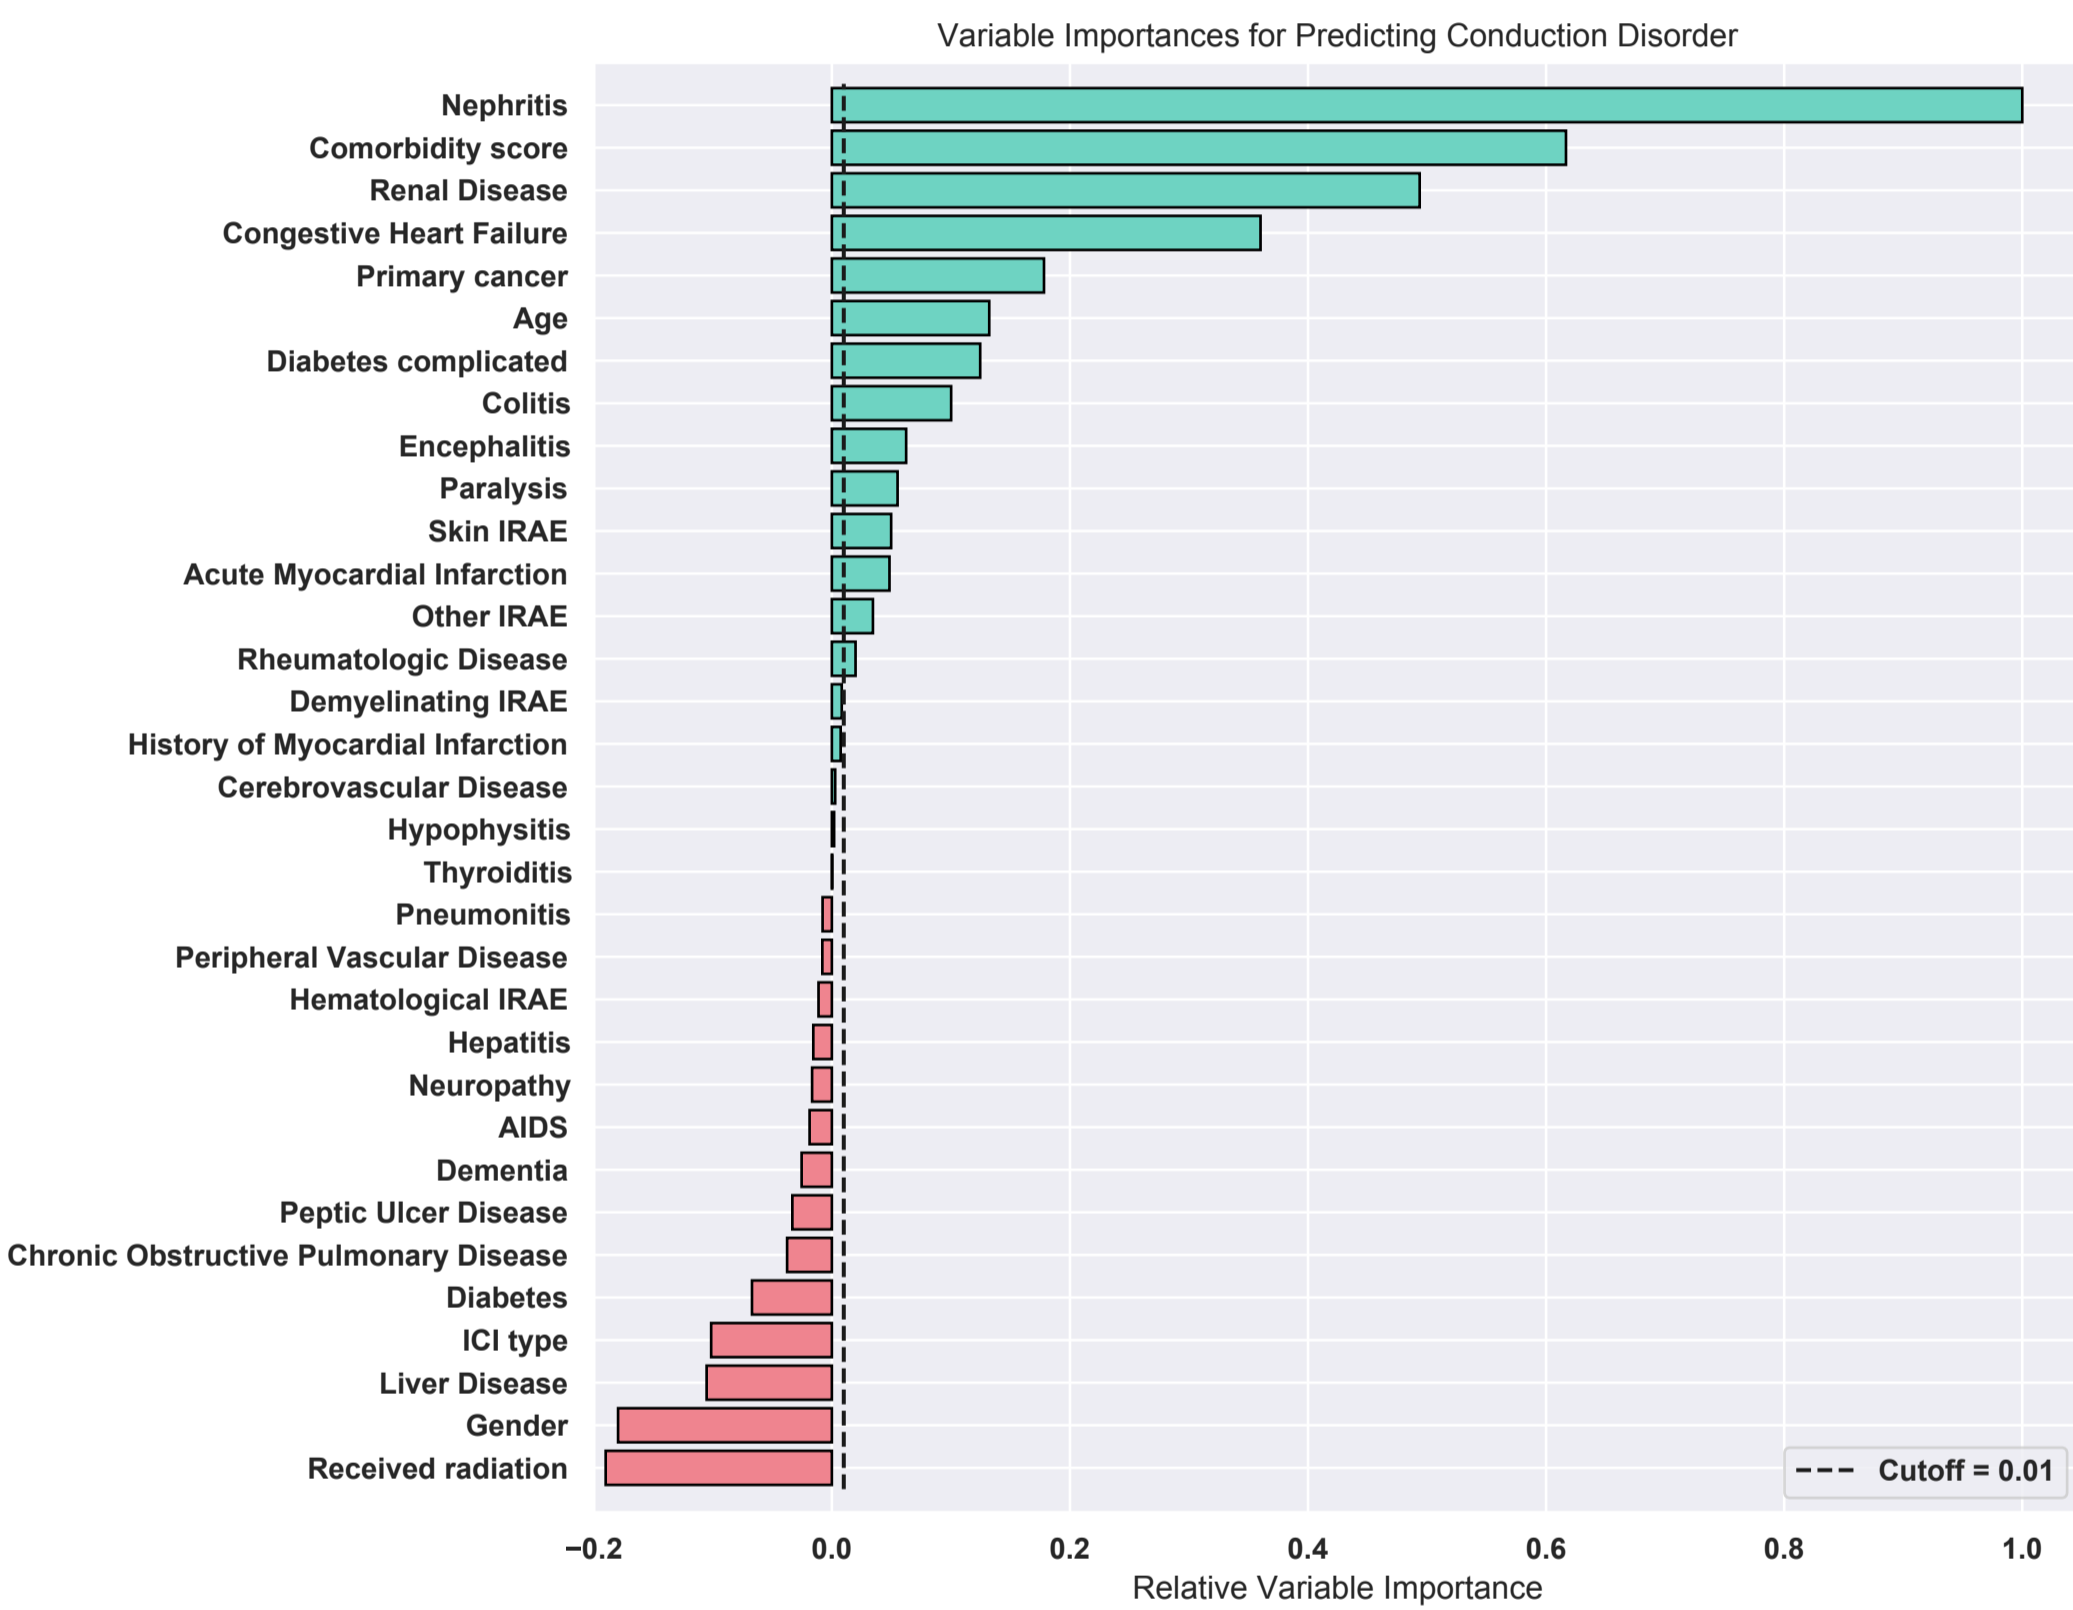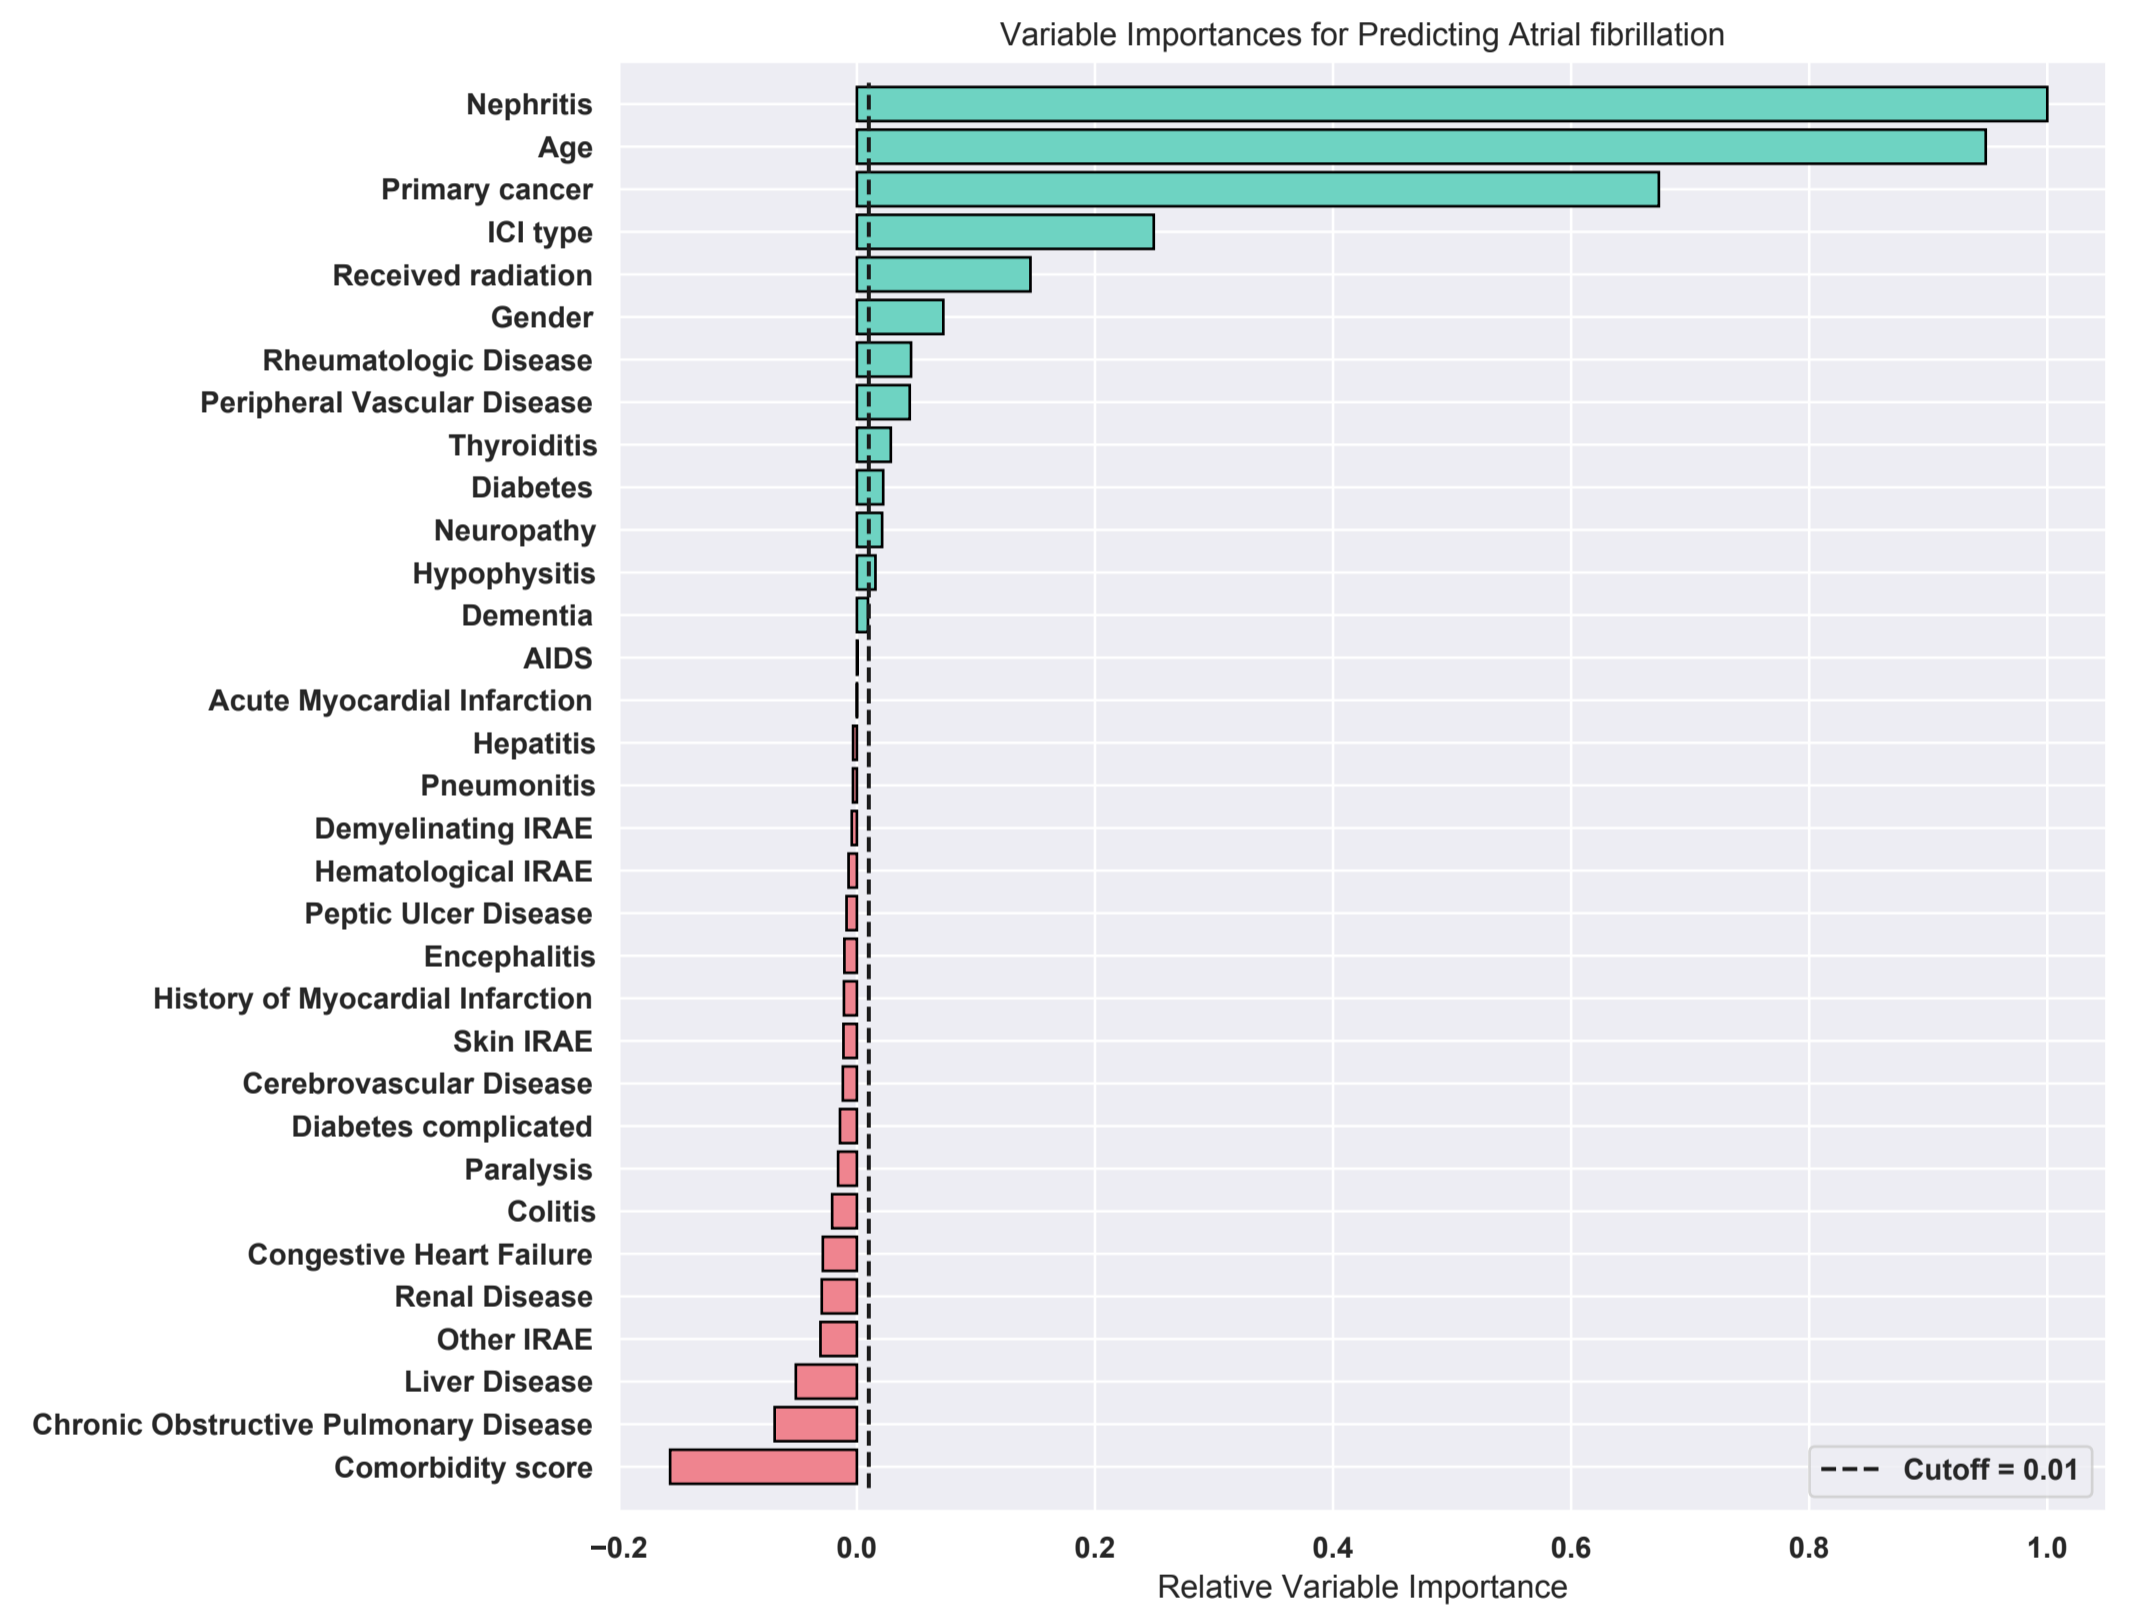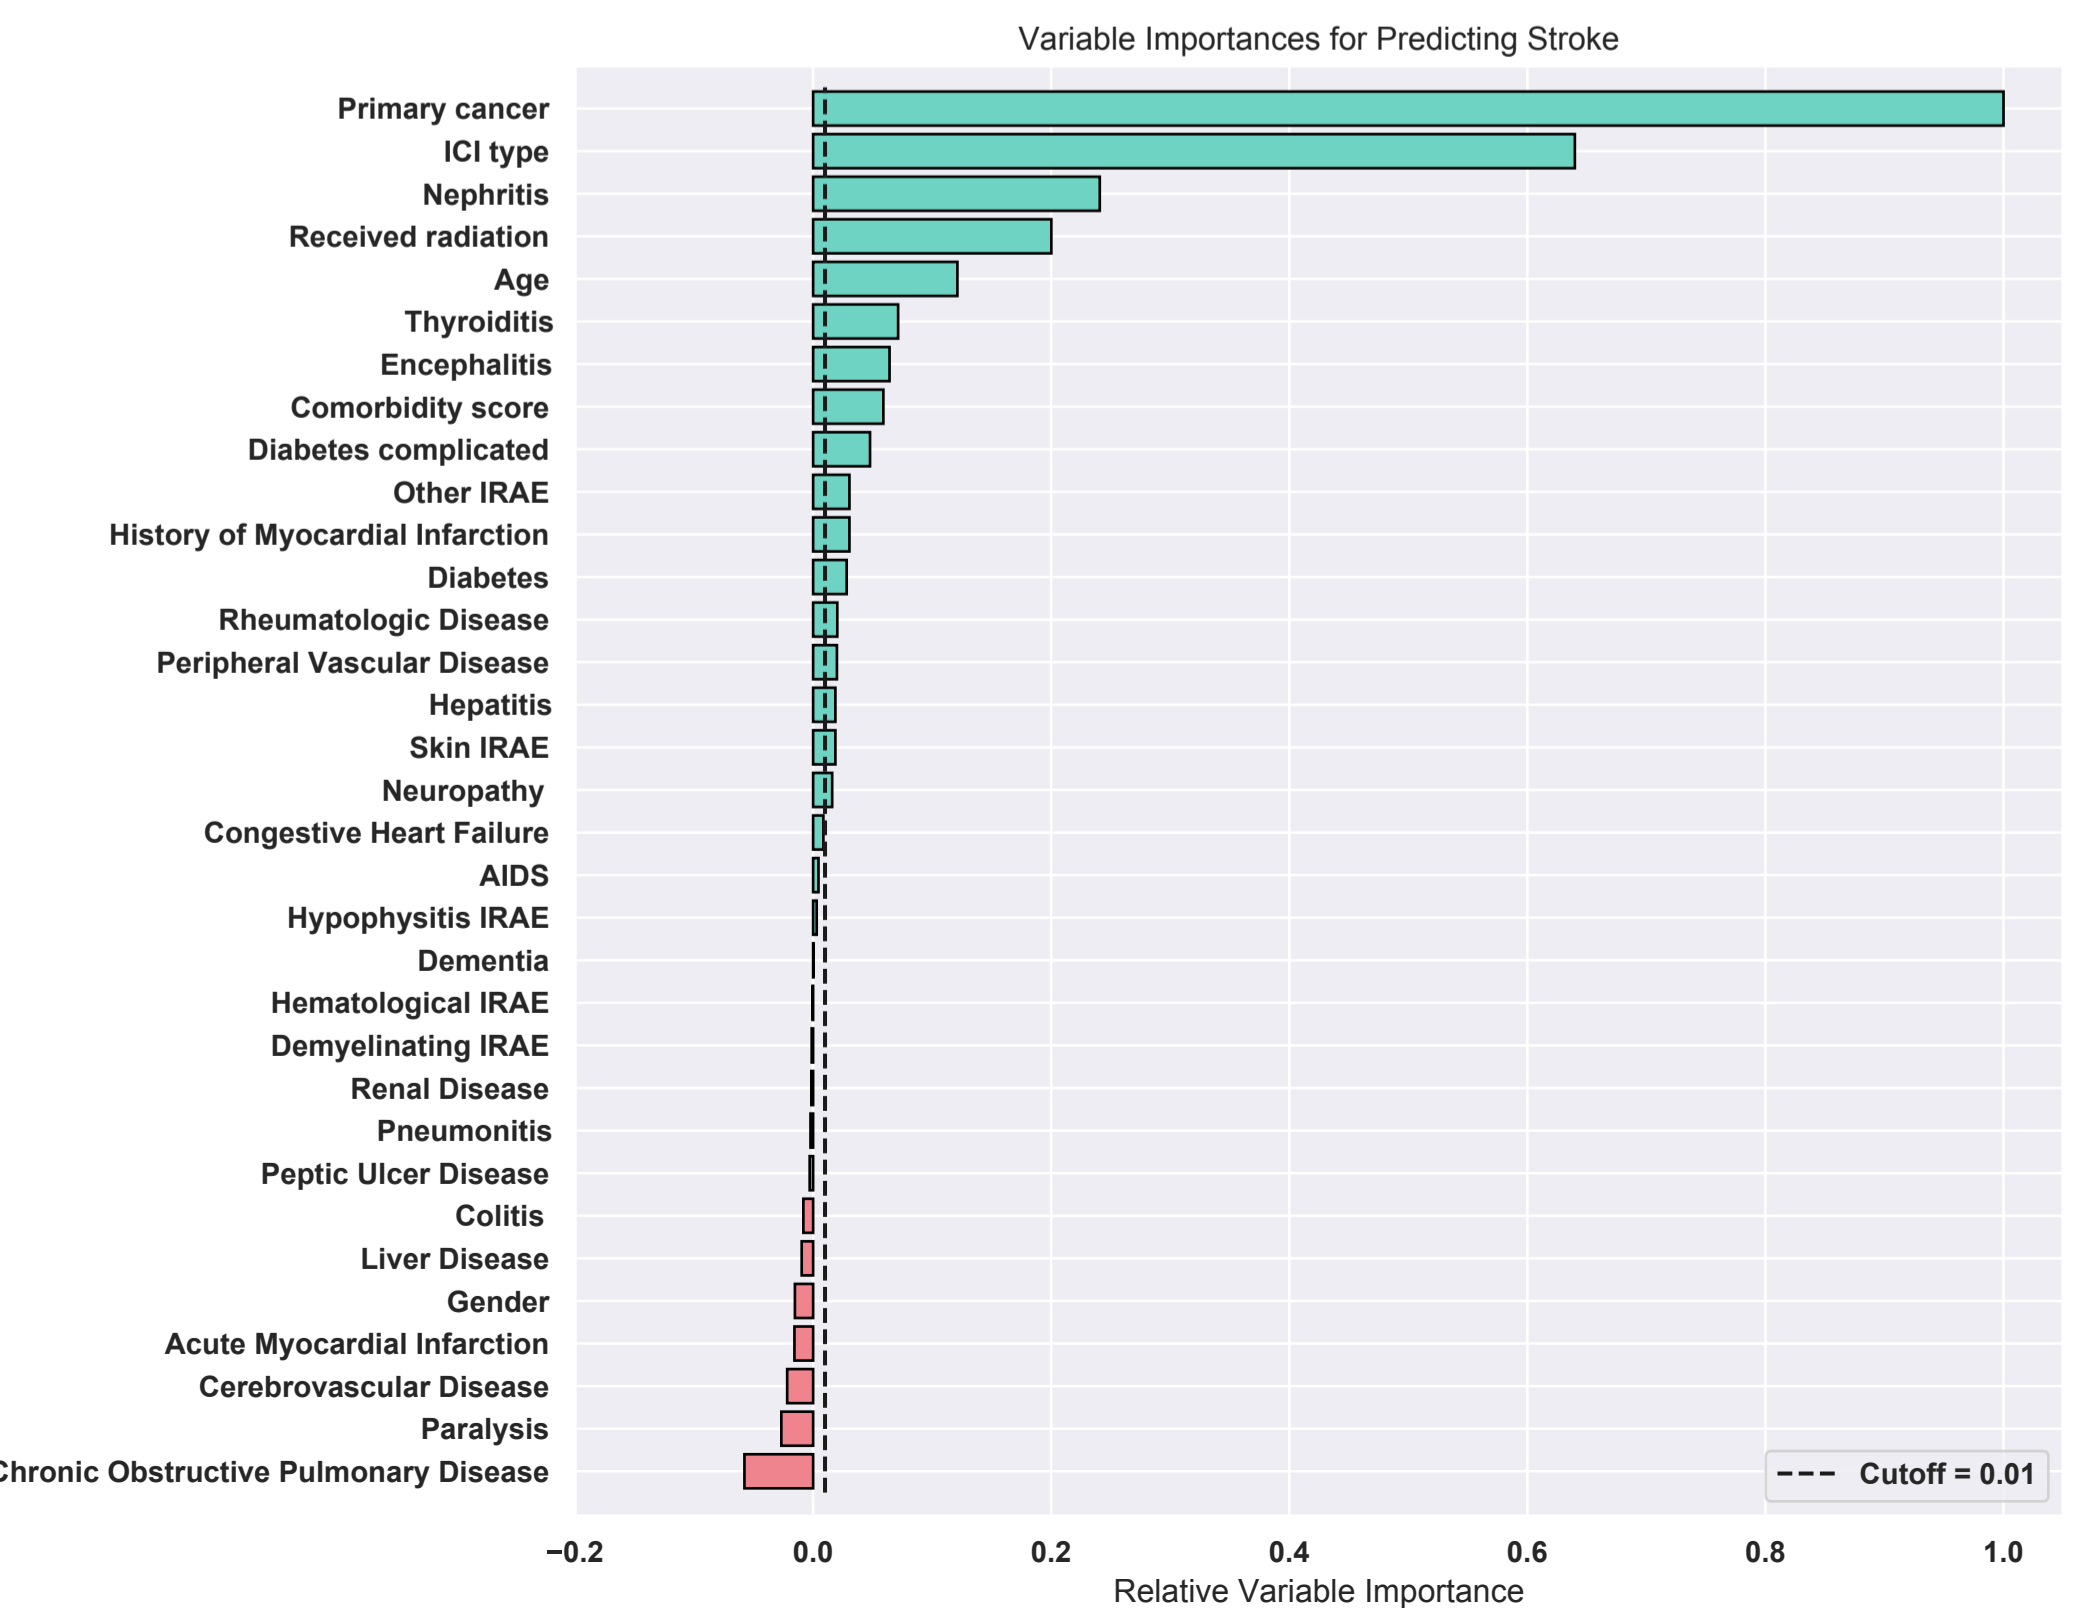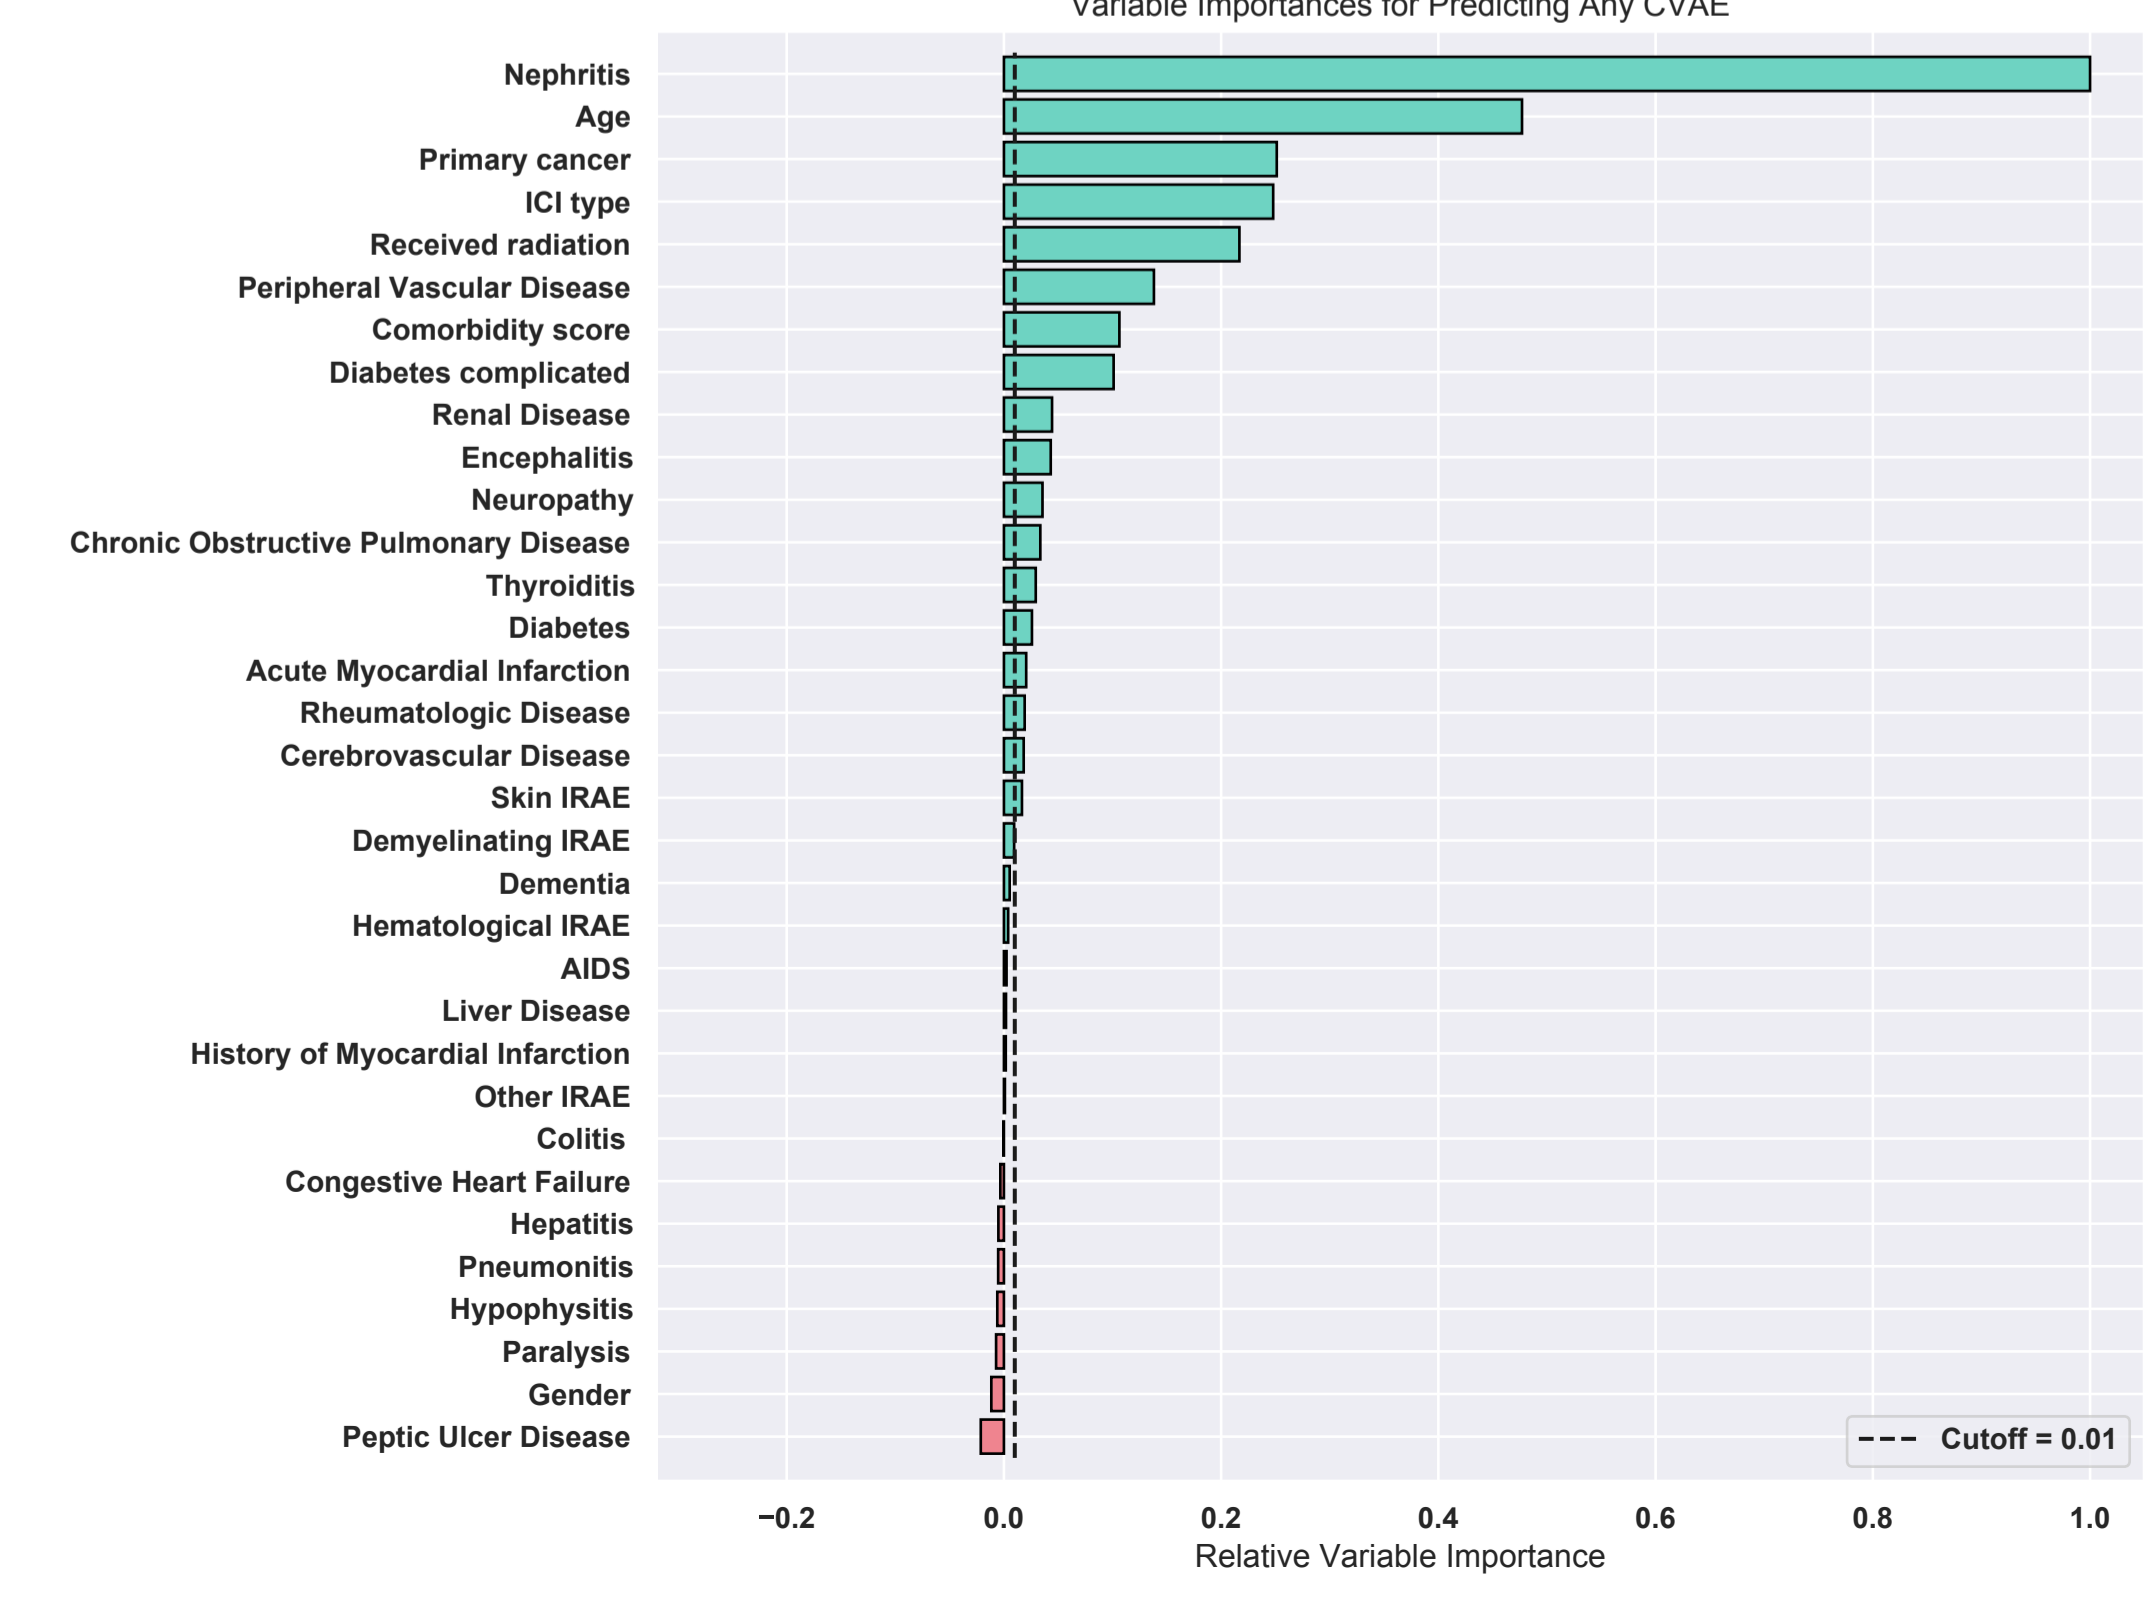

Supplement: mmc4.pdf [file mmc4.pdf]

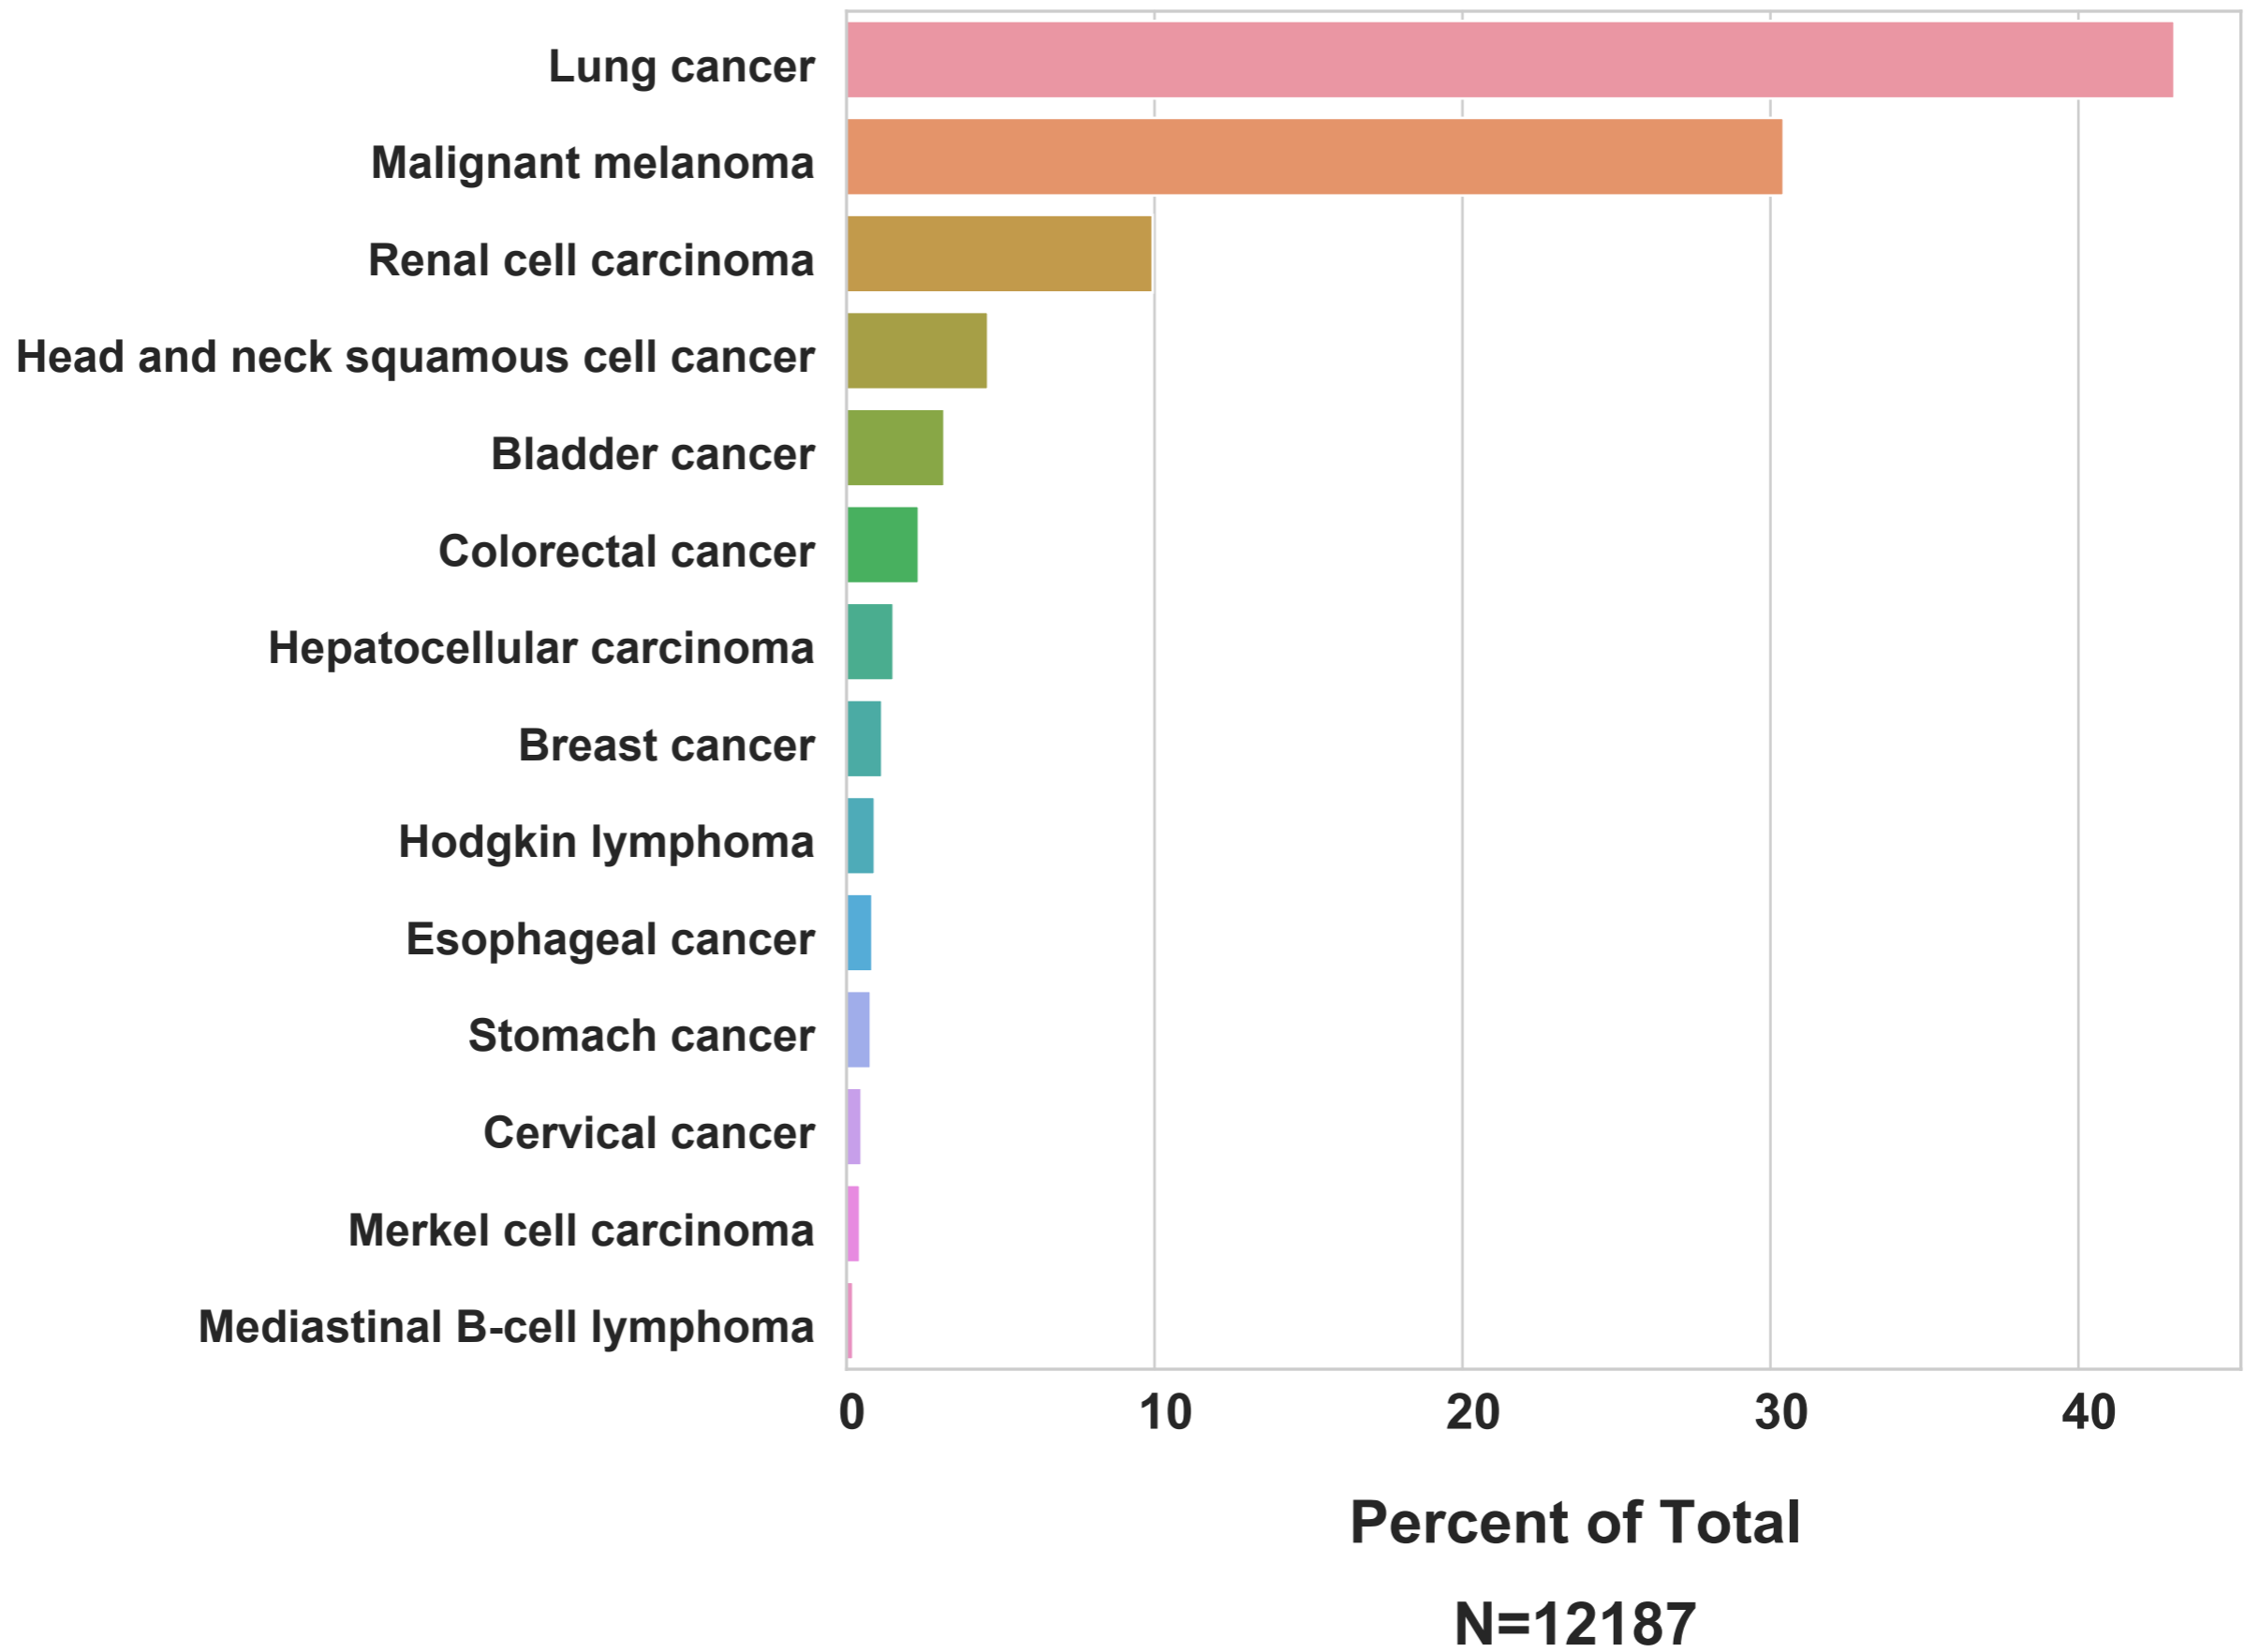

Supplement: mmc6.pdf [file mmc6.pdf]

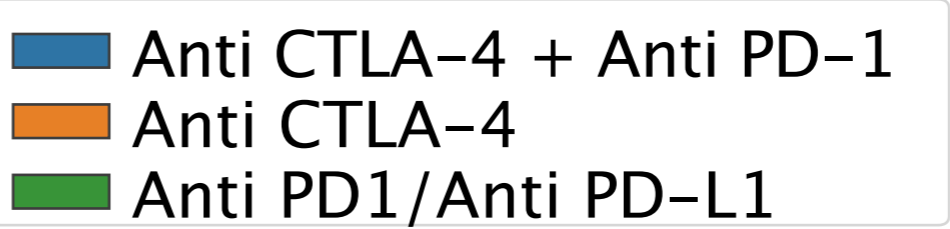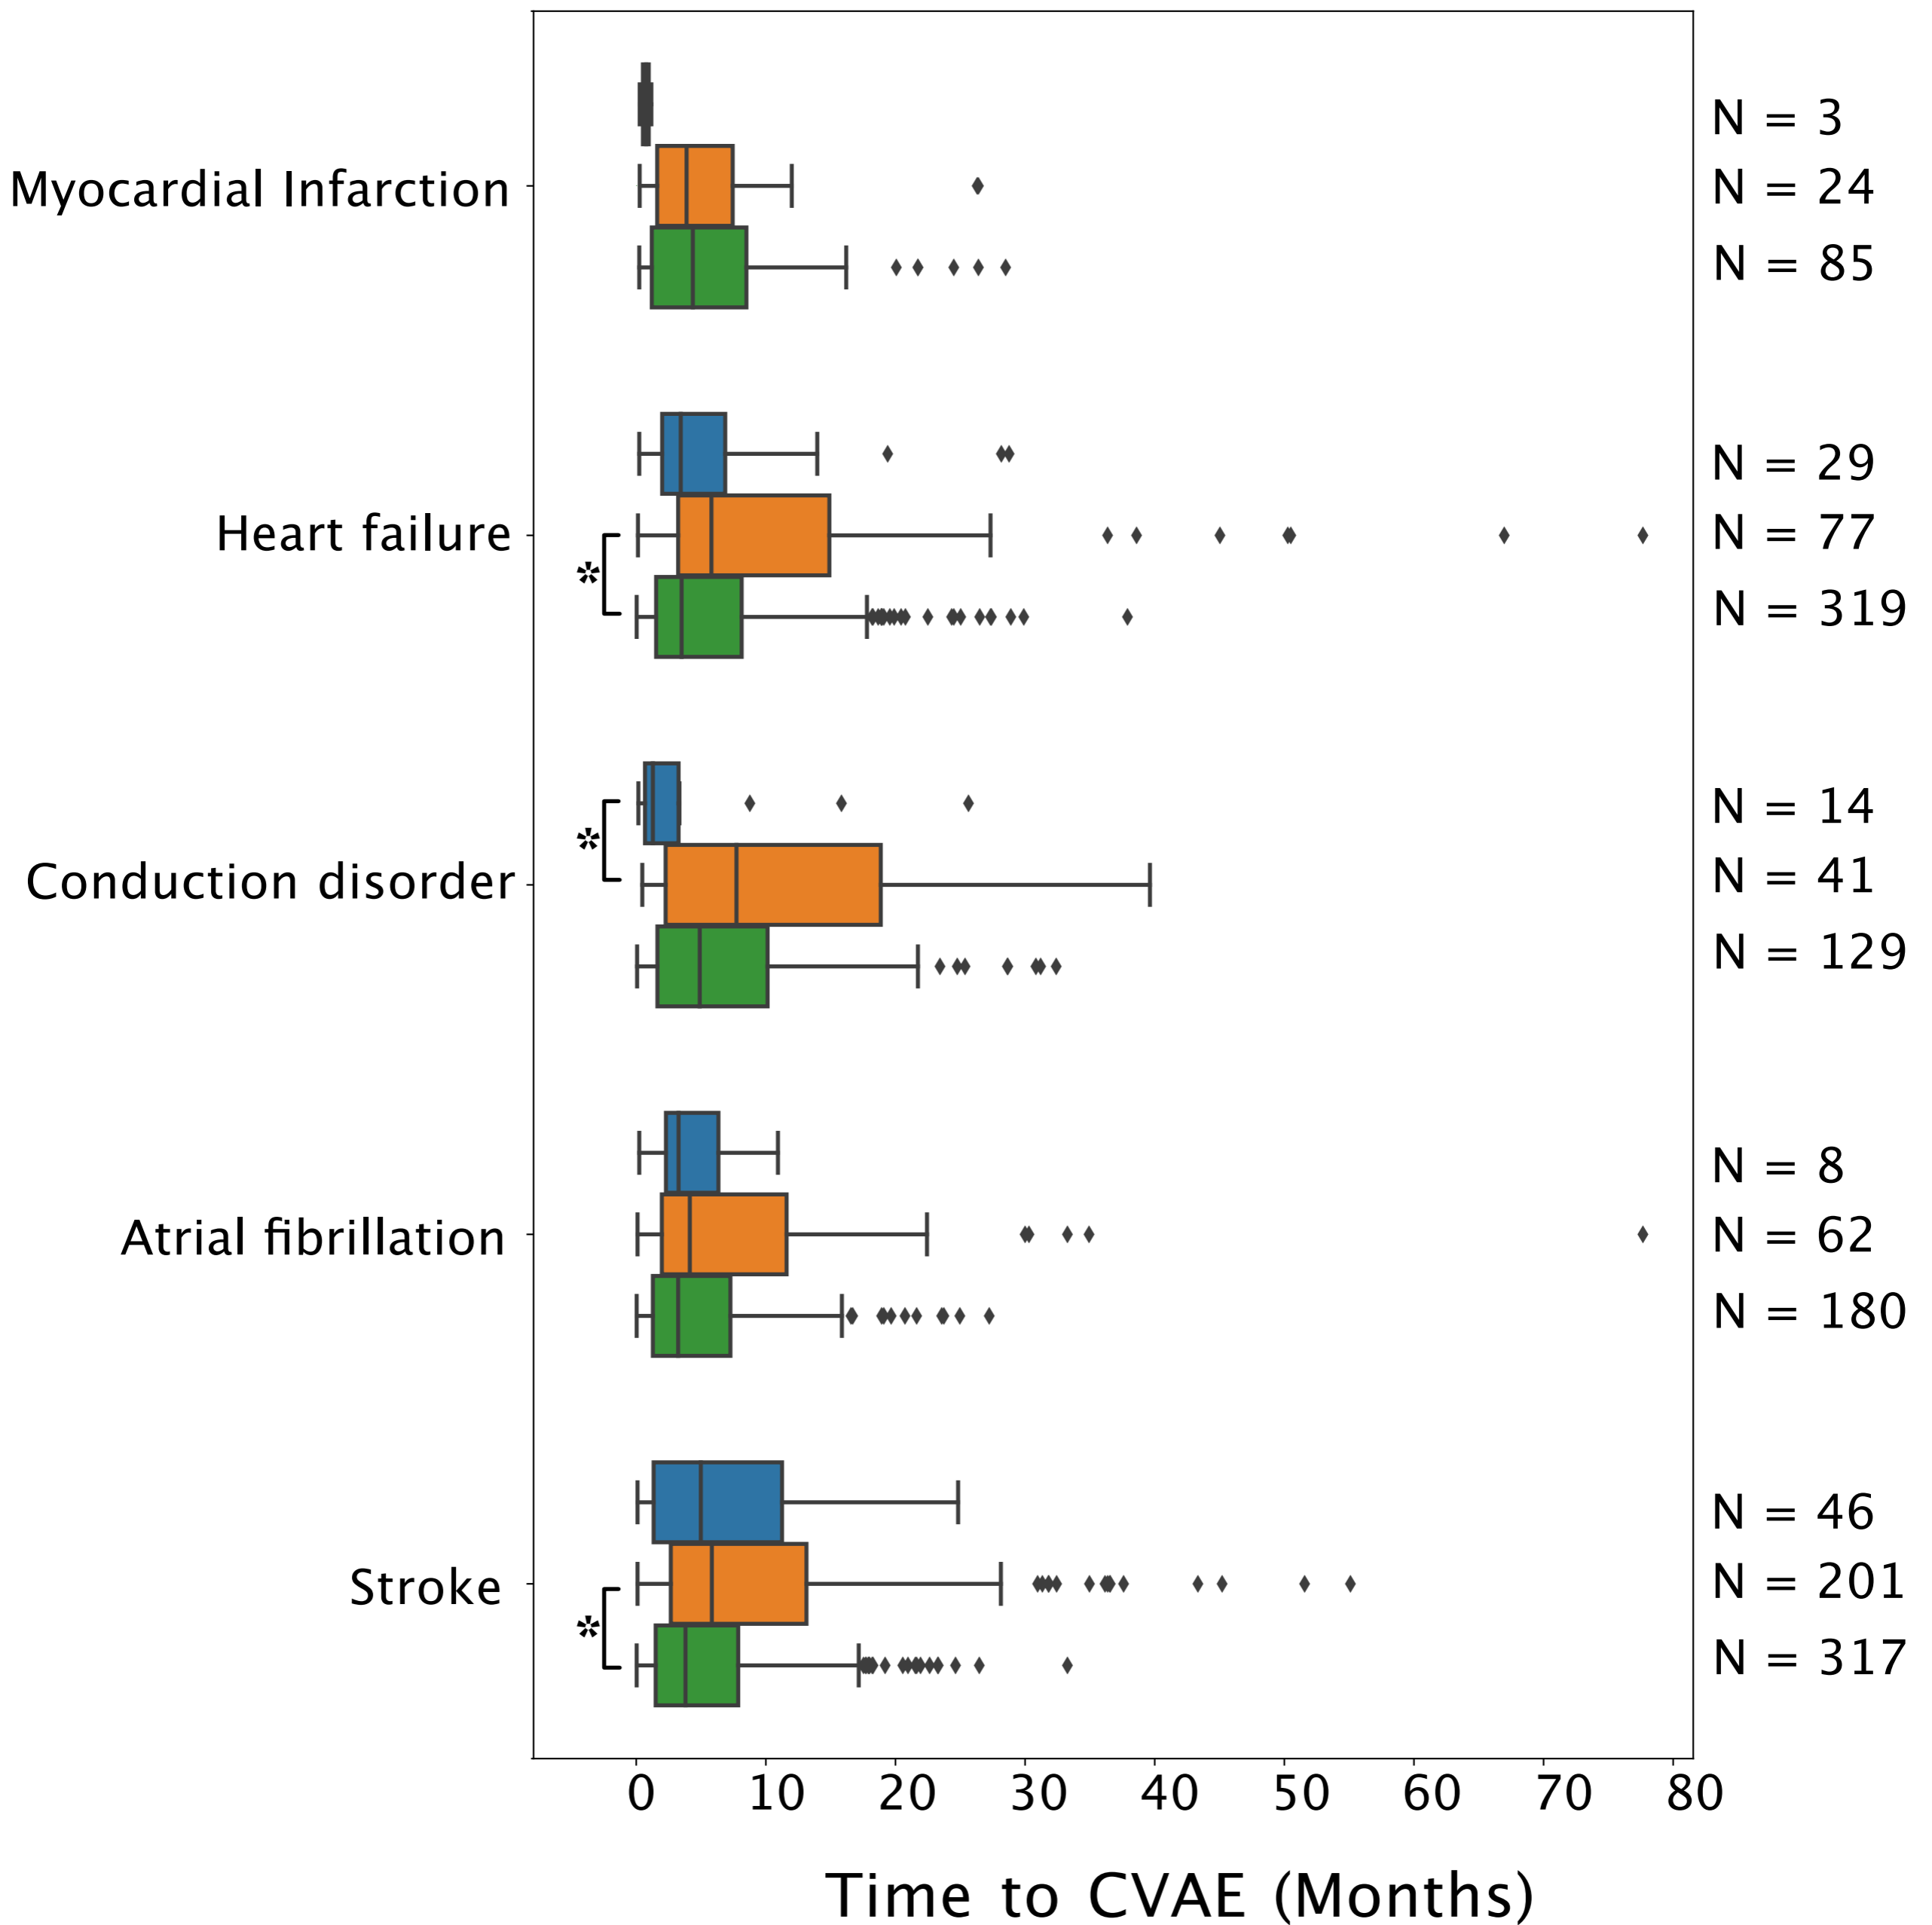

Supplement: mmc7.pdf [file mmc7.pdf]
